# Supplementary material for: Molecular and Merrifield supported chiral diamines for enantioselective addition of ZnR2 (R = Me, Et) to ketones
Source: Royal Society of Chemistry journal article supplement (doi:10.1039/c3dt51097b), 2013-01-01
Supplement: c3dt51097b.pdf [file c3dt51097b.pdf]

## Molecular and Merrifield supported chiral diamines for enantioselective addition of $ZnR_2$ ( $R = Me, Et$ ) to ketones

Mercedes Calvillo-Barahona,<sup>a</sup> Carlos Cordovilla,<sup>a</sup> Miroslav N. Genov,<sup>b</sup> Jesús M. Martínez-Irarduya,<sup>a</sup> and Pablo Espinet\*<sup>a</sup>

<sup>a</sup>*IU CINQUIMA/Química Inorgánica, Facultad de Ciencias, Universidad de Valladolid, 47071 (Spain). [espinet@qi.uva.es](mailto:espinet@qi.uva.es)*

<sup>b</sup>*Present address: Sealife Pharma GmbH, Technopark I/Geb.B/EG, 3430 Tulln (Austria)*

### Supporting Information

#### 1. Chemo- and enantioselective addition to 1-(4-acetylphenyl)-2,2,2-trifluoroethanone.

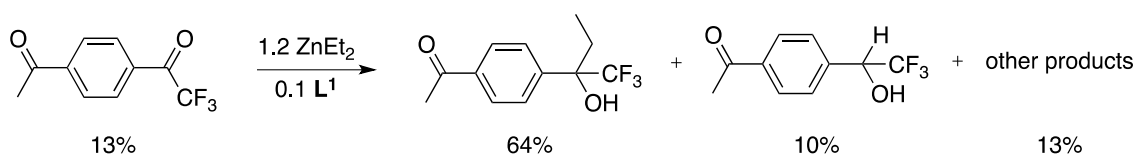

Diethylzinc (1.0 M in toluene, 0.28 mL, 0.28 mmol) was added to a solution of diamine L<sup>1</sup> (35 mg, 0.046 mmol, 10 mol %) in anhydrous toluene (1 mL) under argon at -20 °C. The solution was stirred for 30 minutes and 1-(4-acetylphenyl)-2,2,2-trifluoroethanone (50 mg, 0.23 mmol) was added at -40 °C and this temperature is retained. After the reaction was complete, it was quenched with saturated ammonium chloride solution, extracted with ether, and filtered over silica gel. The solvents were removed under reduced pressure. The ee was determined by HPLC on Chiralpak IA using n-hexane/IPA 90:10 as the mobile phase,  $t_1 = 6.86$  min,  $t_2 = 7.53$  min. 47% ee. Chemical yields were determined by <sup>19</sup>F NMR.

**1-(4-(1,1,1-trifluoro-2-hydroxybutan-2-yl)phenyl)ethanone.** <sup>19</sup>F NMR (376.50 MHz, CD<sub>3</sub>OD)  $\delta = -81.57$ . <sup>1</sup>H NMR (400.13 MHz, CD<sub>3</sub>OD)  $\delta = 0.73$  (t,  $J = 7.2$  Hz, 3H), 2.10 (m,  $J = 7.19$  Hz, 1H), 2.25 (m,  $J = 7.19$  Hz, 1H), 4.88 (s, 3H), 7.72 (d,  $J = 7.5$  Hz, 2H), 8.02 (d,  $J = 7.5$  Hz, 2H). MS: Calculated mass: 246.09; Measured mass: 246.08.

## 2. NMR spectra:

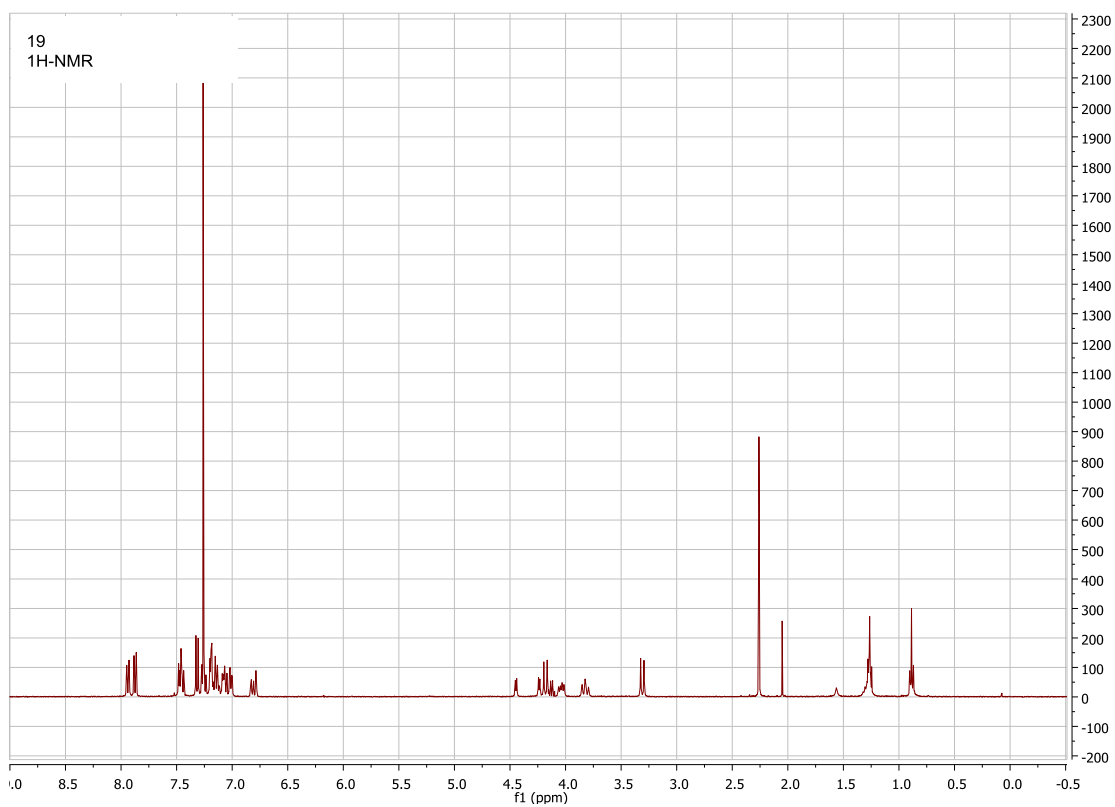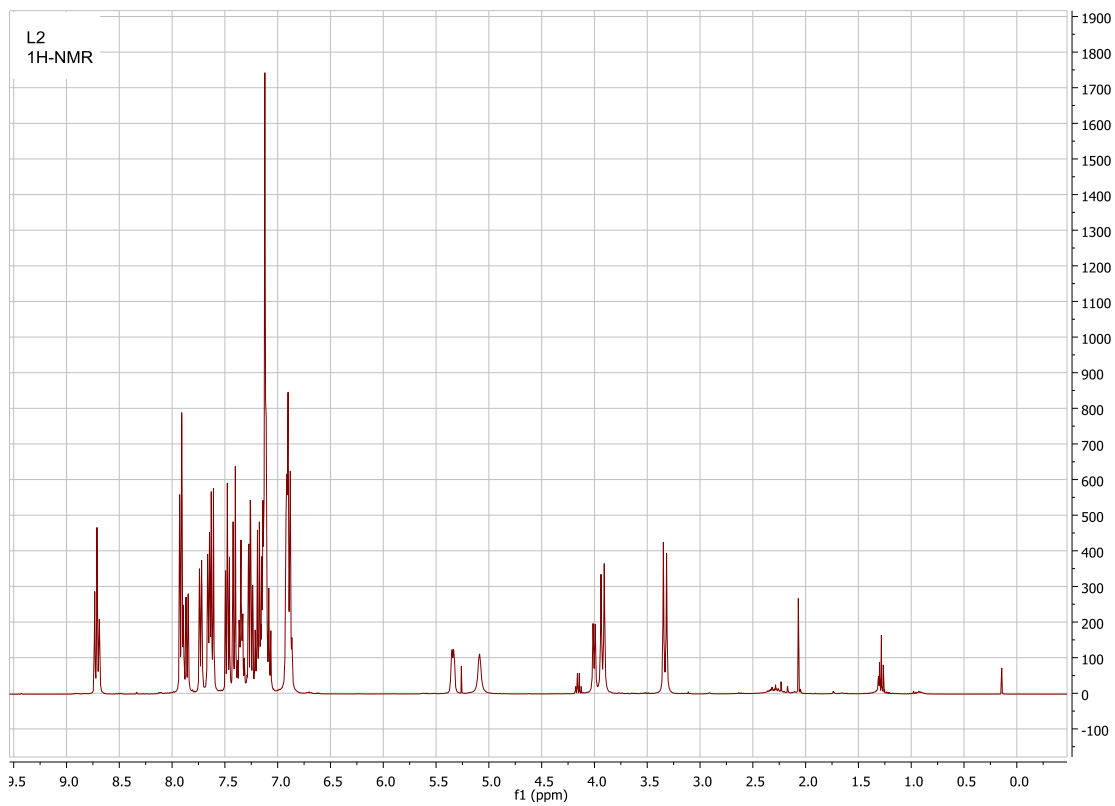

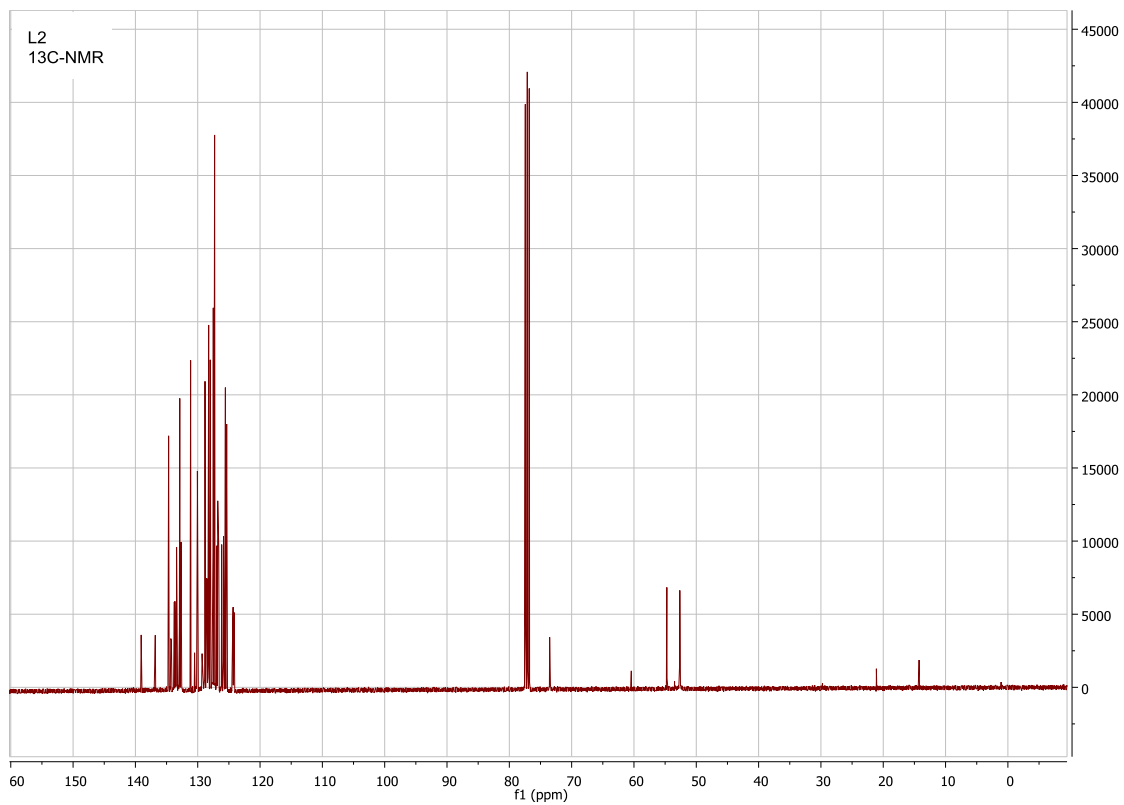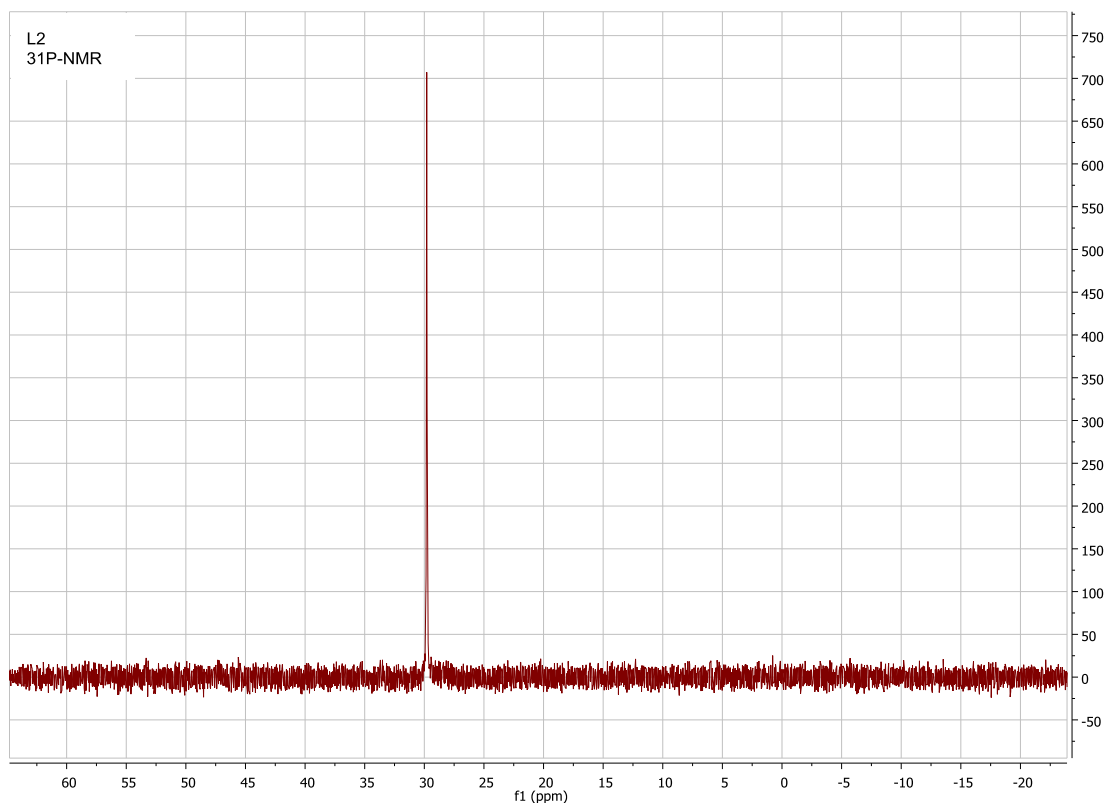

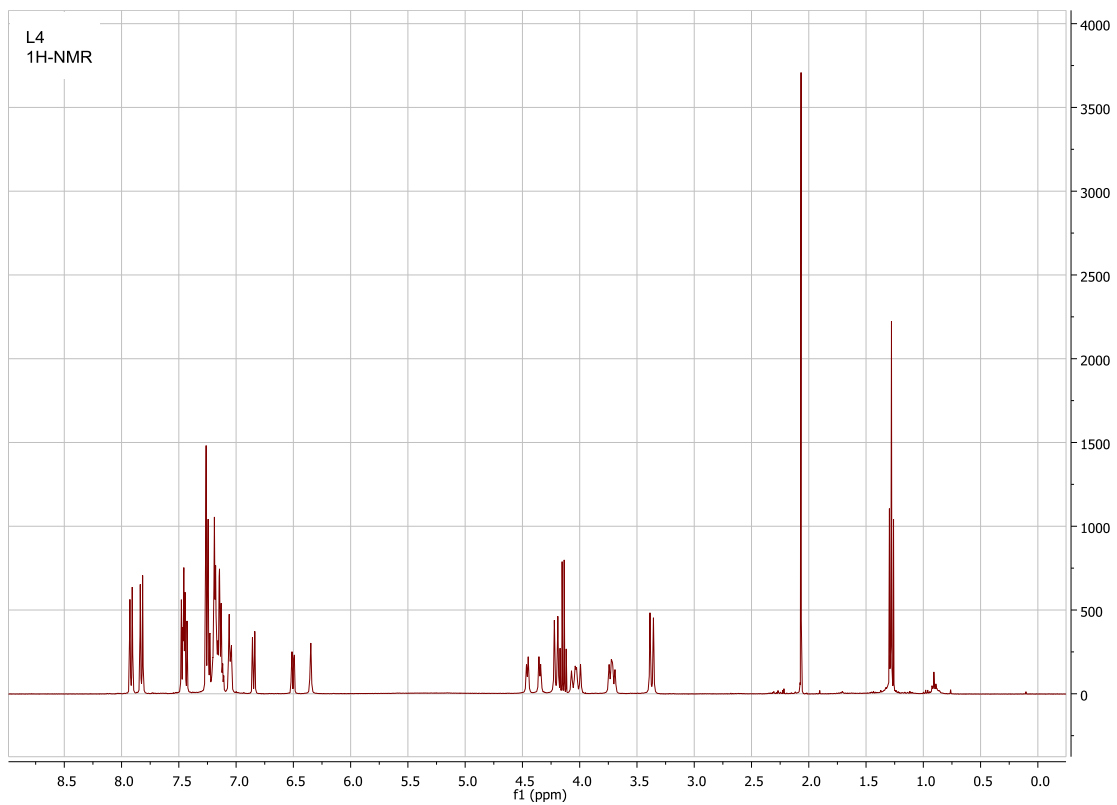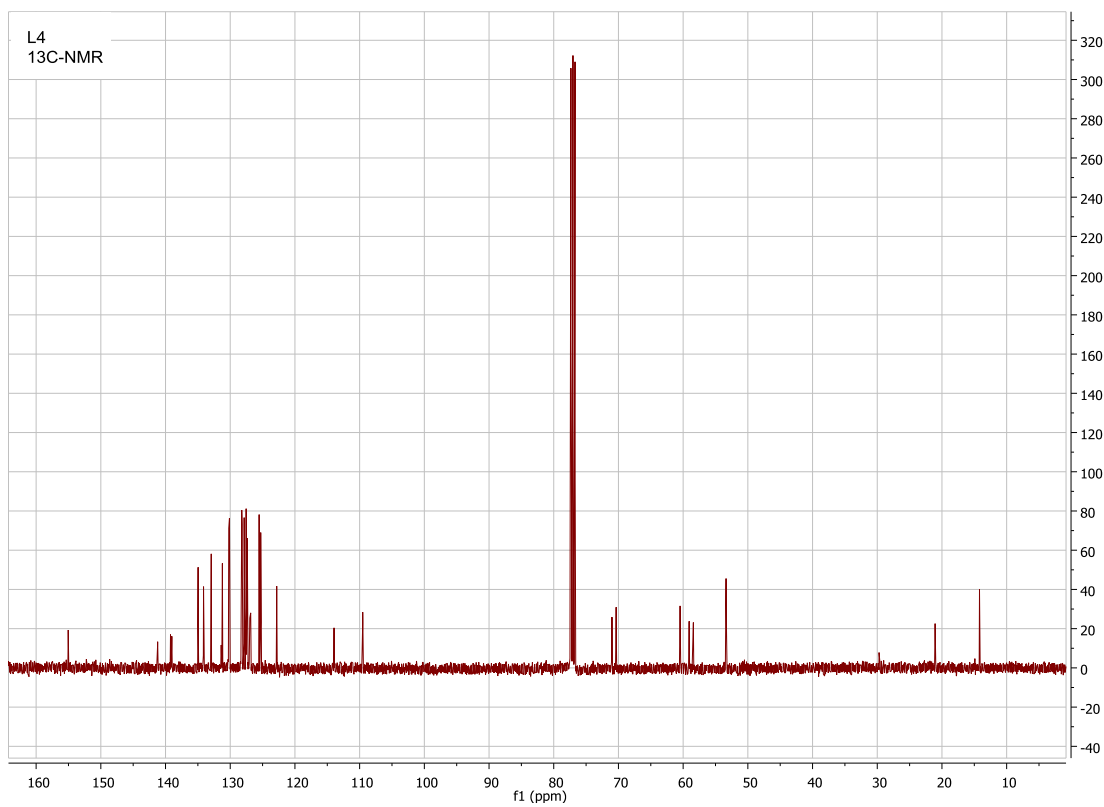

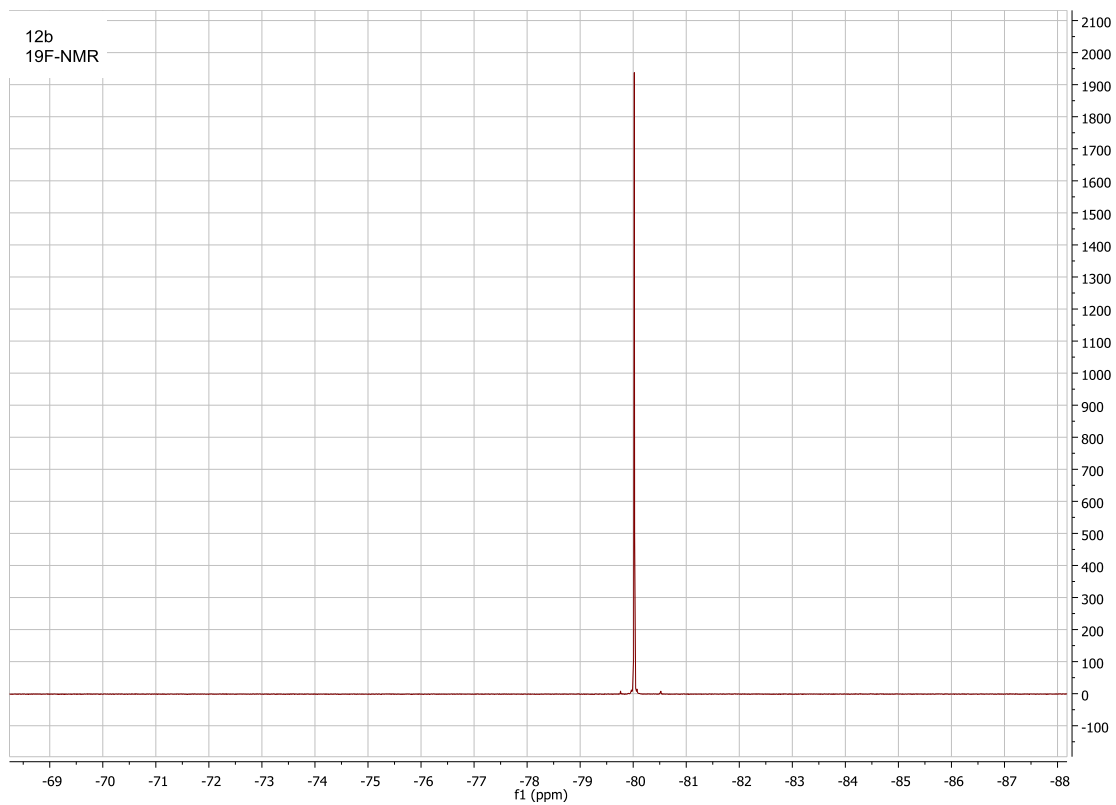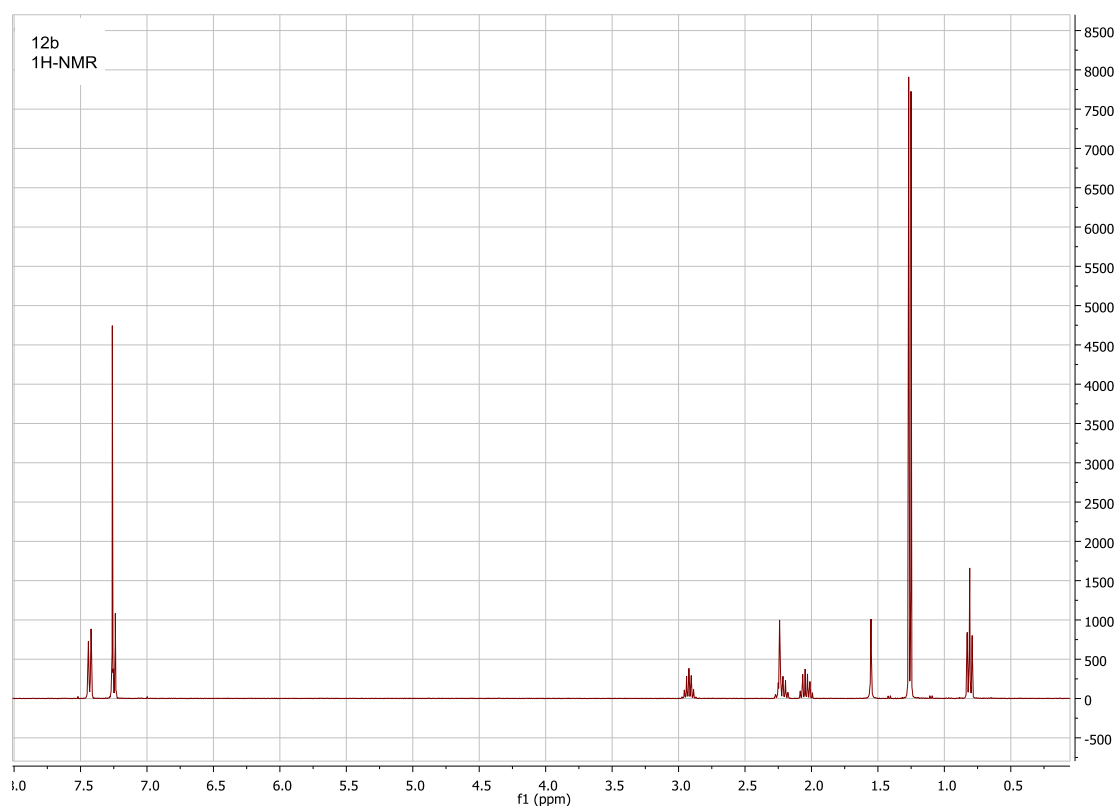

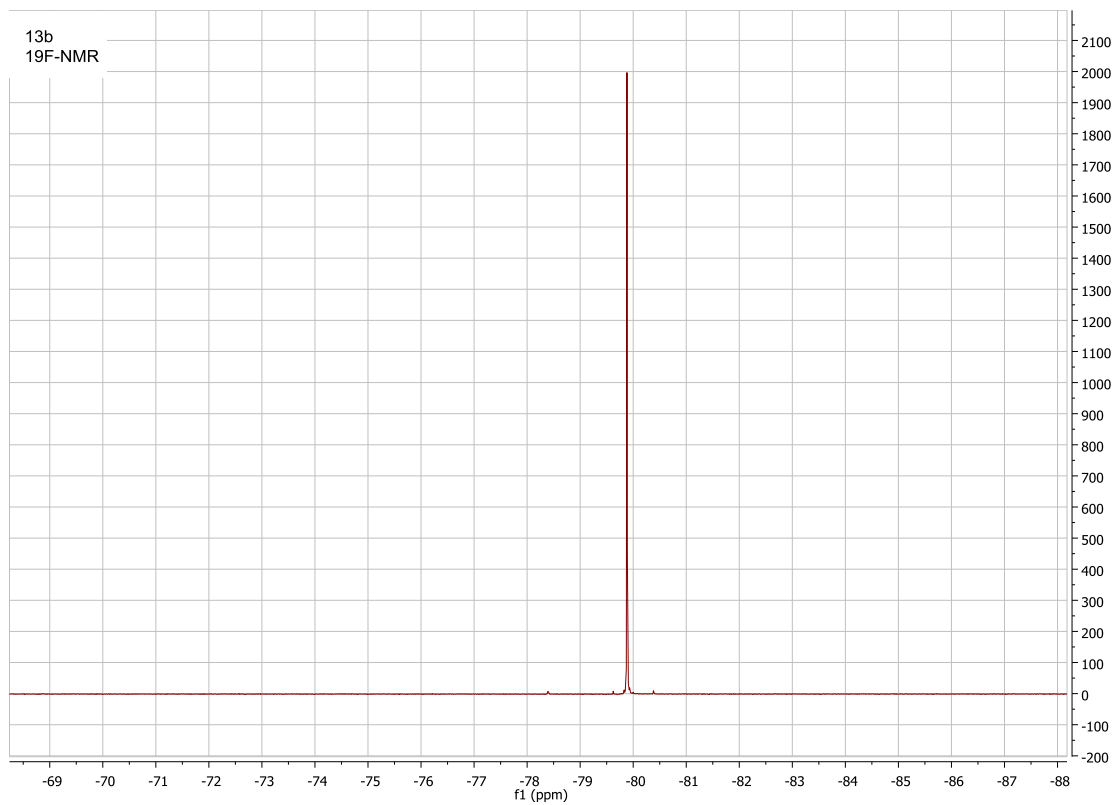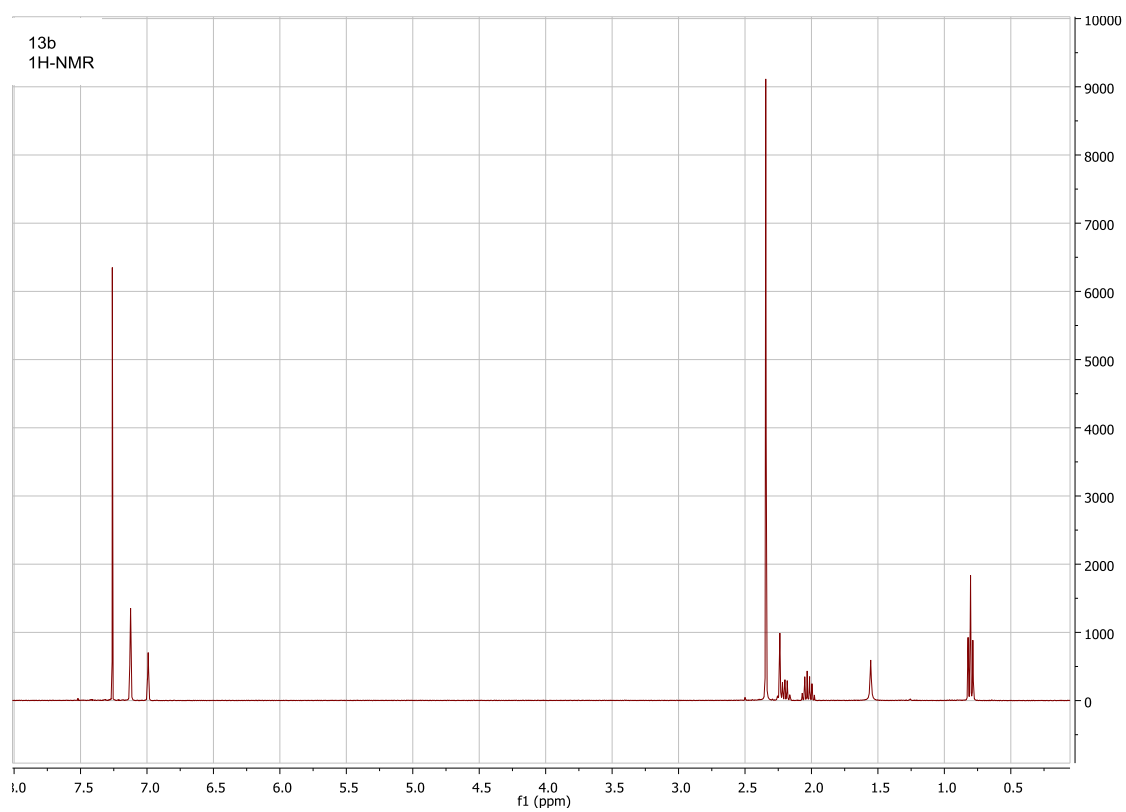

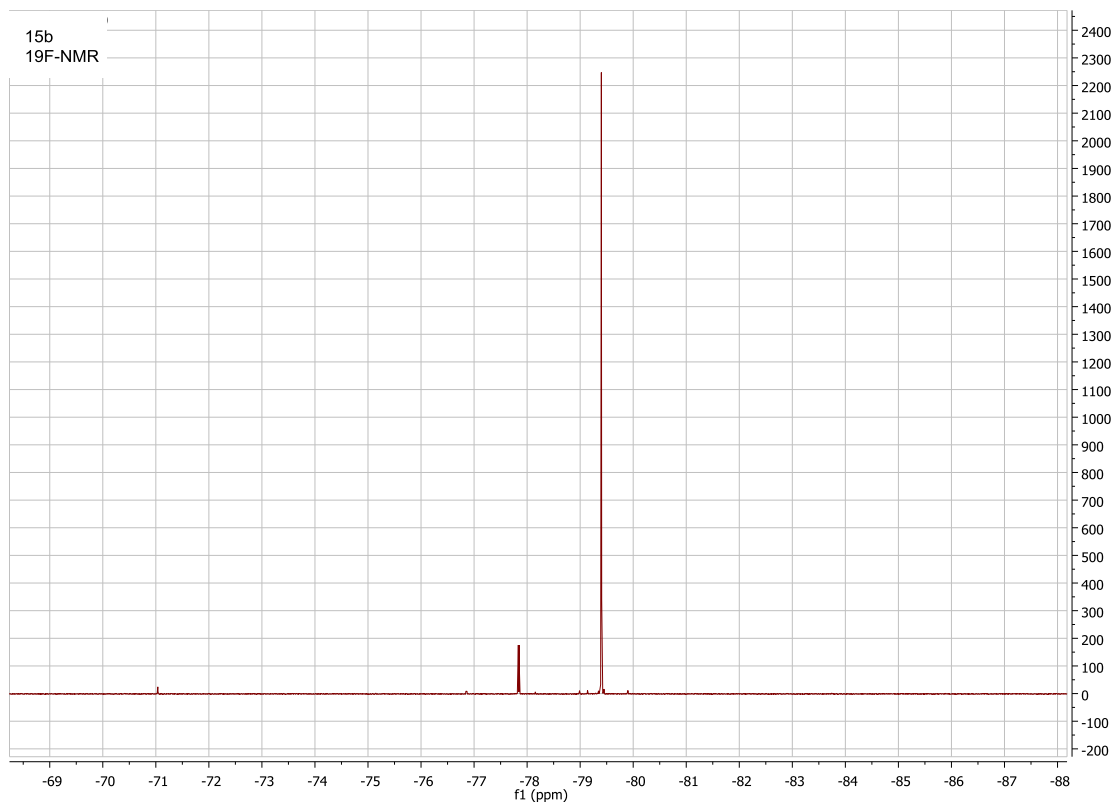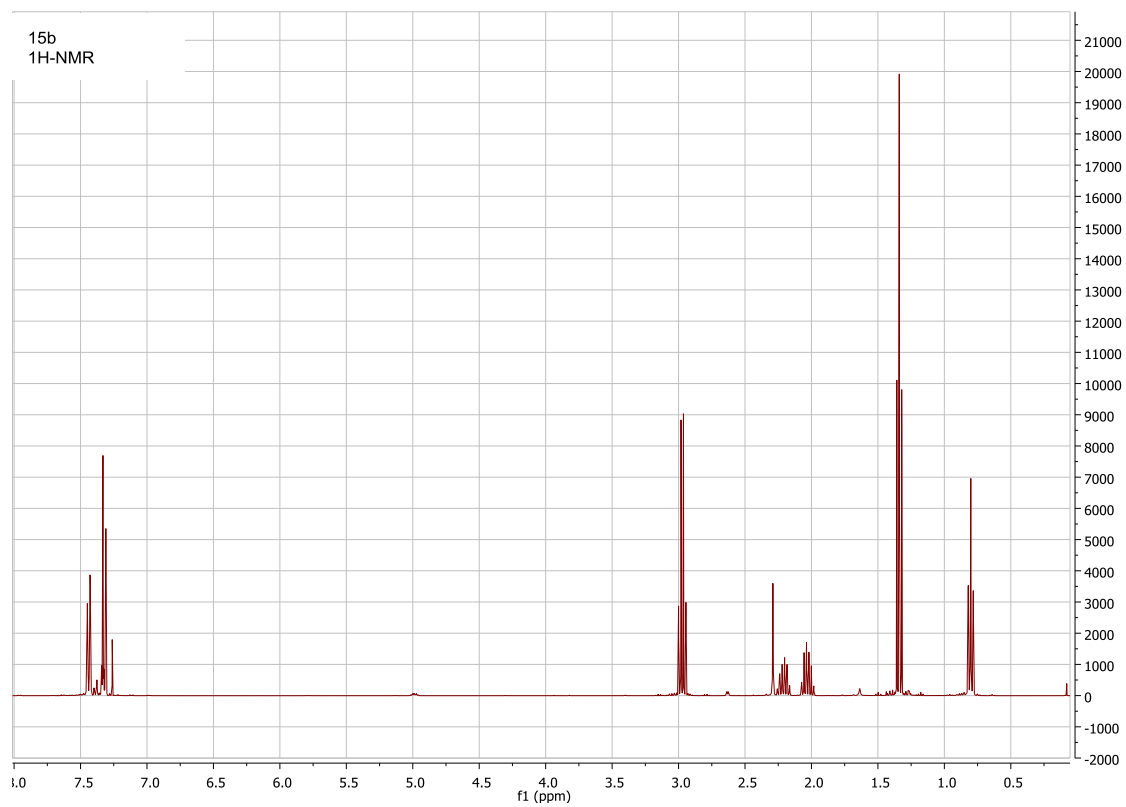

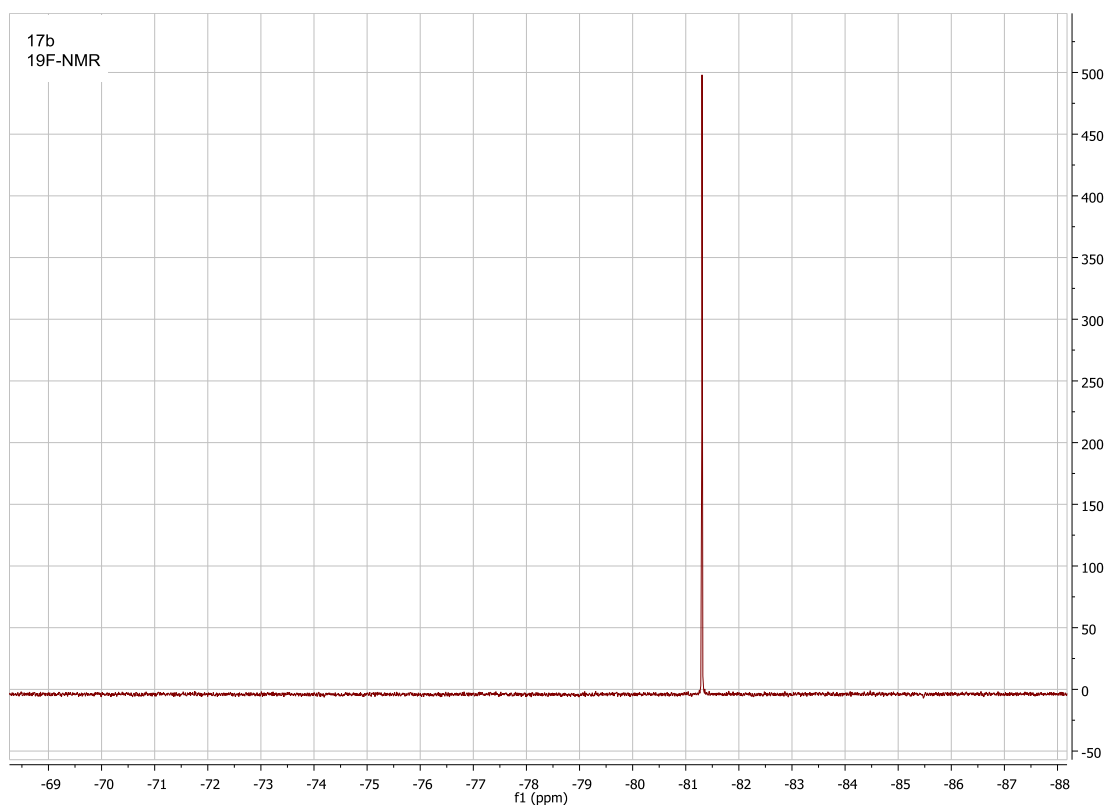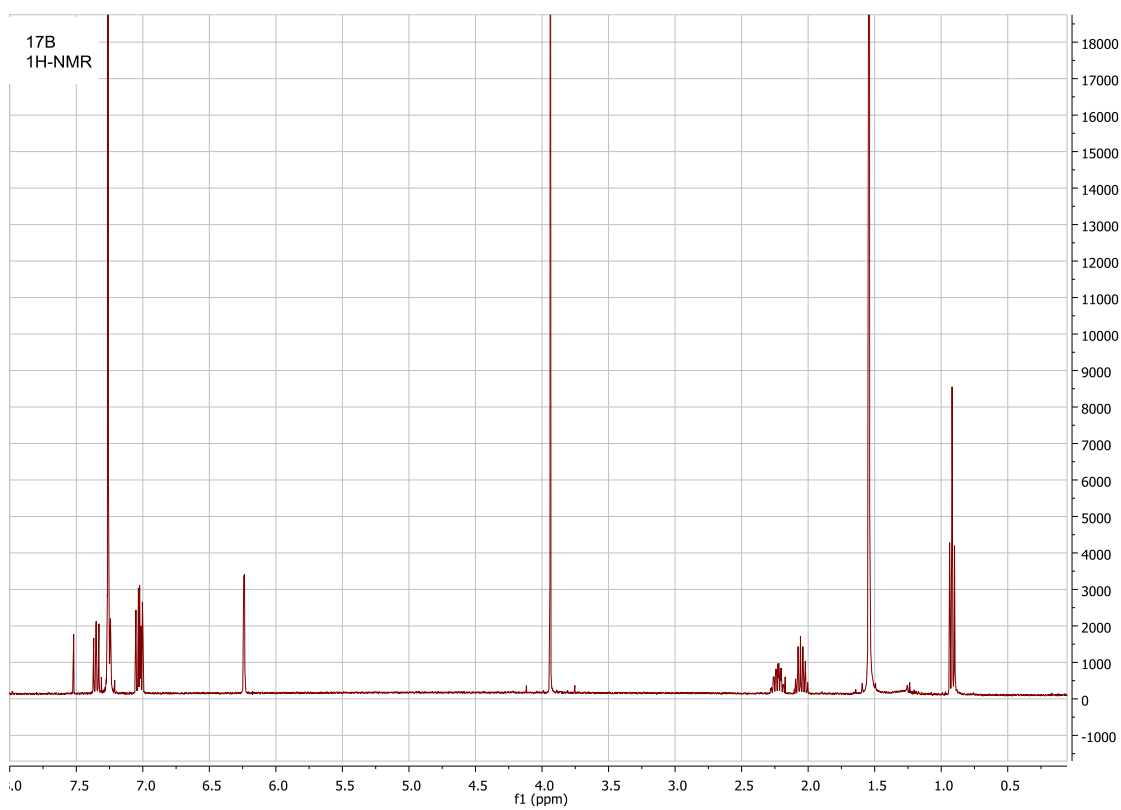



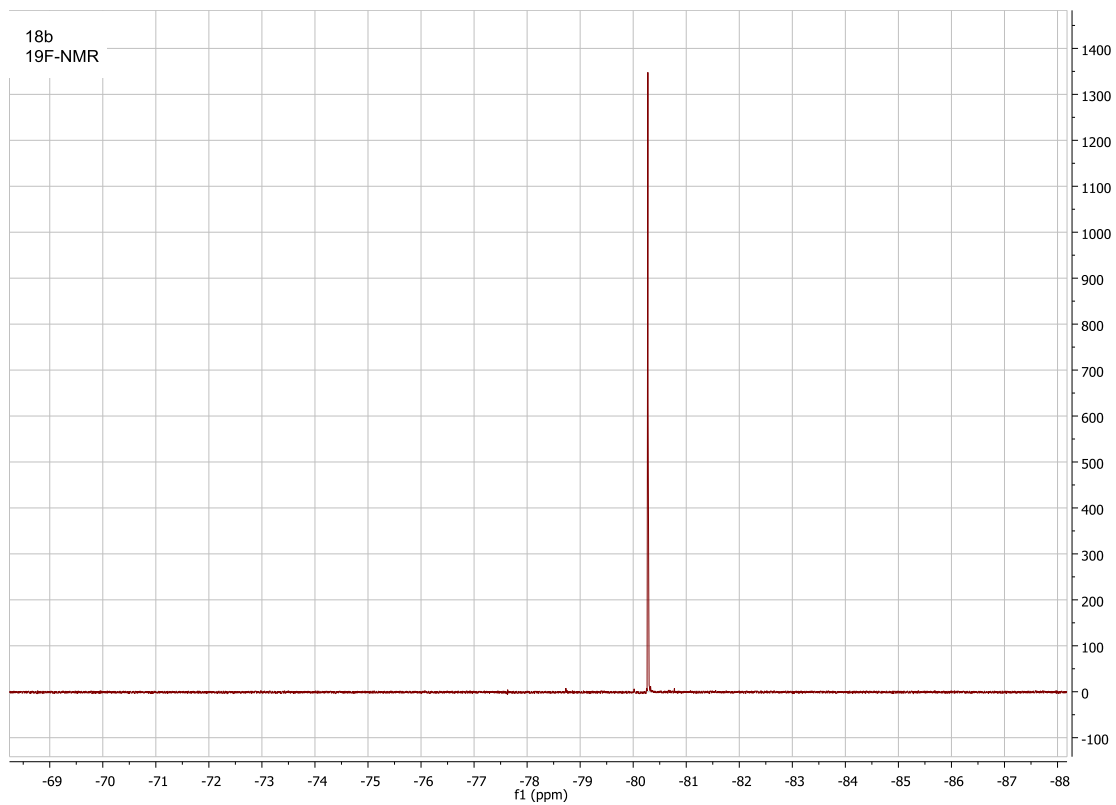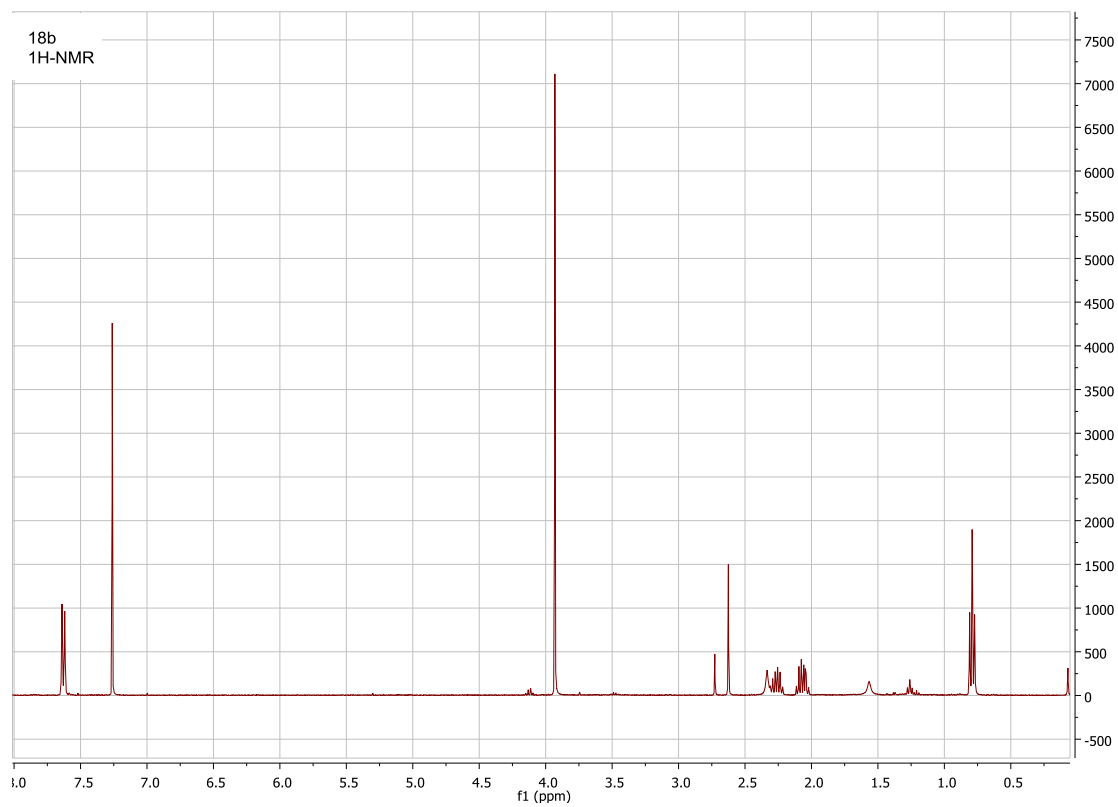

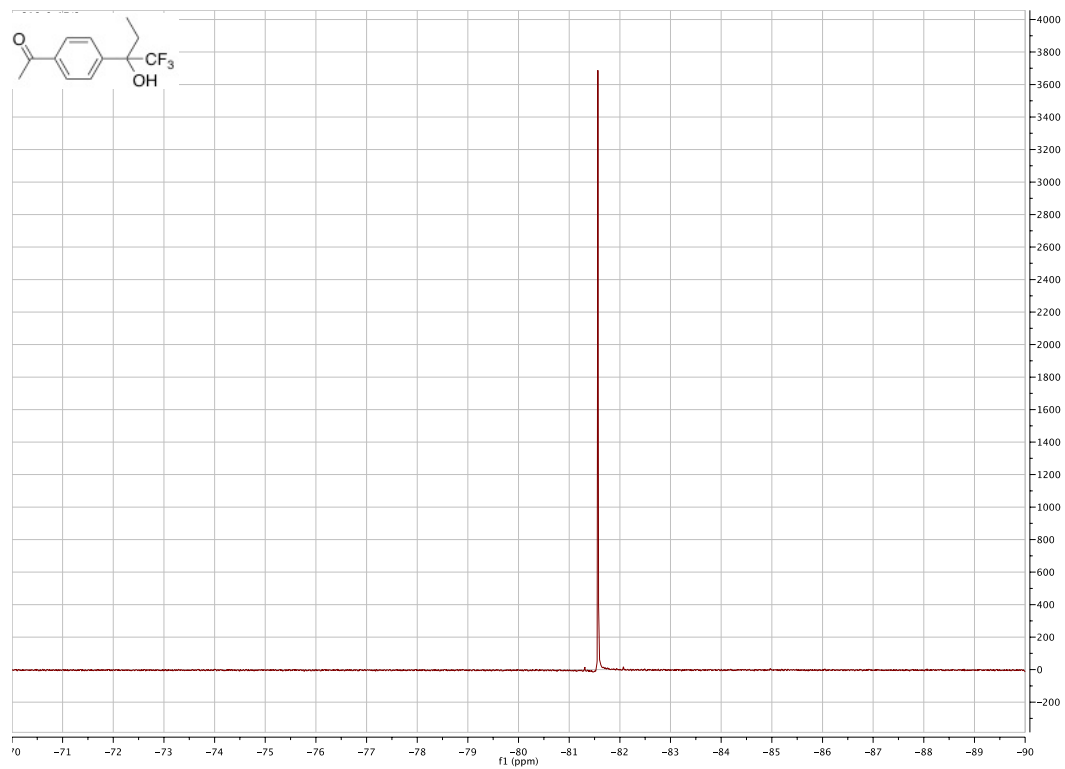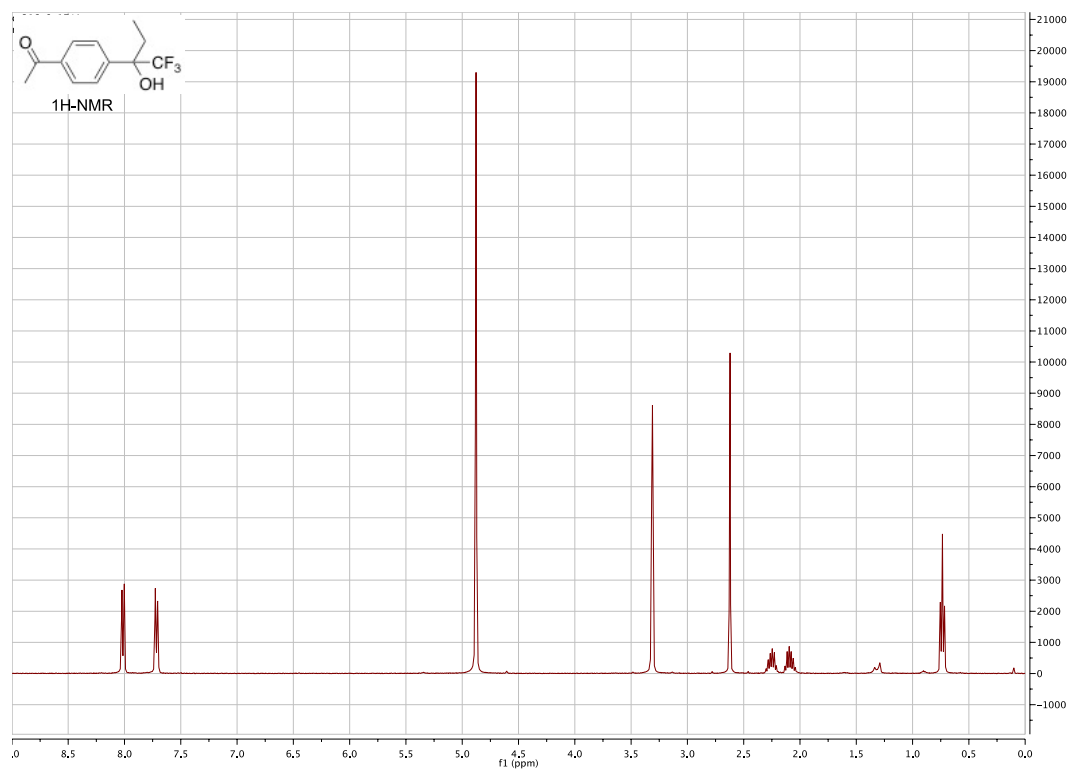

### 3. CG and HPLC Chromatograms

7a

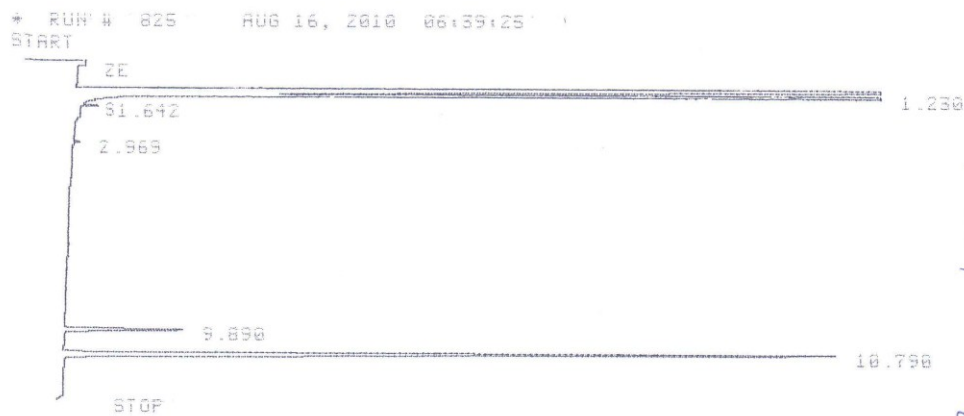

RUN# 825 AUG 16, 2010 06:59:25

AREA

| RT     | AREA     | TYPE | WIDTH | AREA%    |
|--------|----------|------|-------|----------|
| 1.230  | 23153440 | >SPB | .045  | 96.53338 |
| 1.642  | 4261     | BB   | .025  | .01777   |
| 2.969  | 5470     | BU   | .046  | .01447   |
| 9.890  | 103074   | PU   | .090  | .42975   |
| 10.790 | 720664   | BB   | .097  | 3.00466  |

P-22:110 °C  
lipotein E

- 75% ee

12a

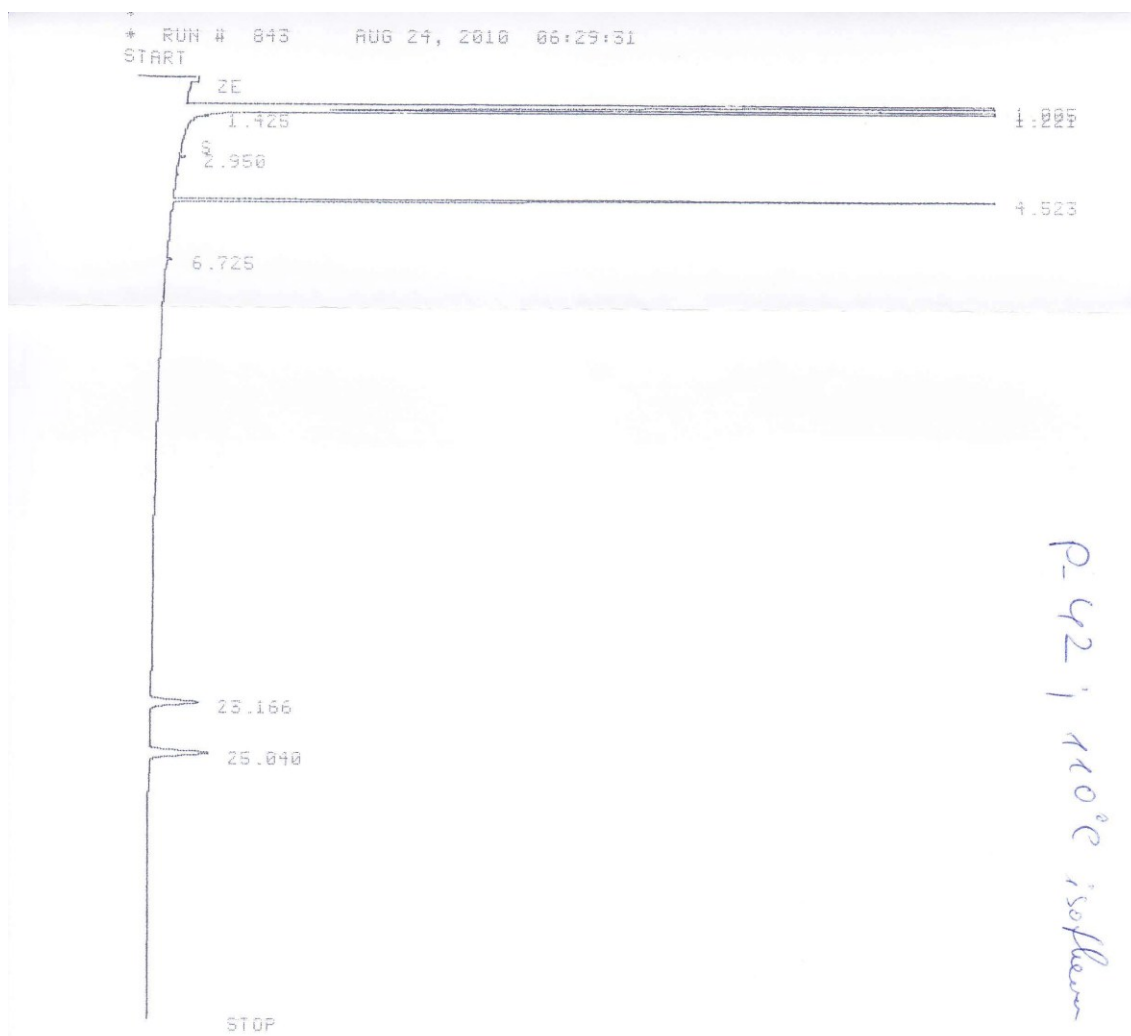

RUN# 843    AUG 24, 2010 06:29:31

| RT     | AREA     | TYPE | WIDTH | AREA%    |
|--------|----------|------|-------|----------|
| 1.005  | 43577952 | >SBB | .085  | 60.67709 |
| 1.221  | 27474640 | >TBB | .054  | 38.25514 |
| 1.425  | 1376     | TBB  | .018  | .00192   |
| 2.950  | 2725     | BB   | .039  | .00379   |
| 4.523  | 543646   | BB   | .044  | .75696   |
| 6.725  | 5151     | UP   | .084  | .00717   |
| 23.166 | 95379    | FP   | .205  | .13280   |
| 25.040 | 118633   | BP   | .213  | .16518   |

TOTAL AREA=7.1819E+07  
MUL FACTOR=1.0000E+00

14a

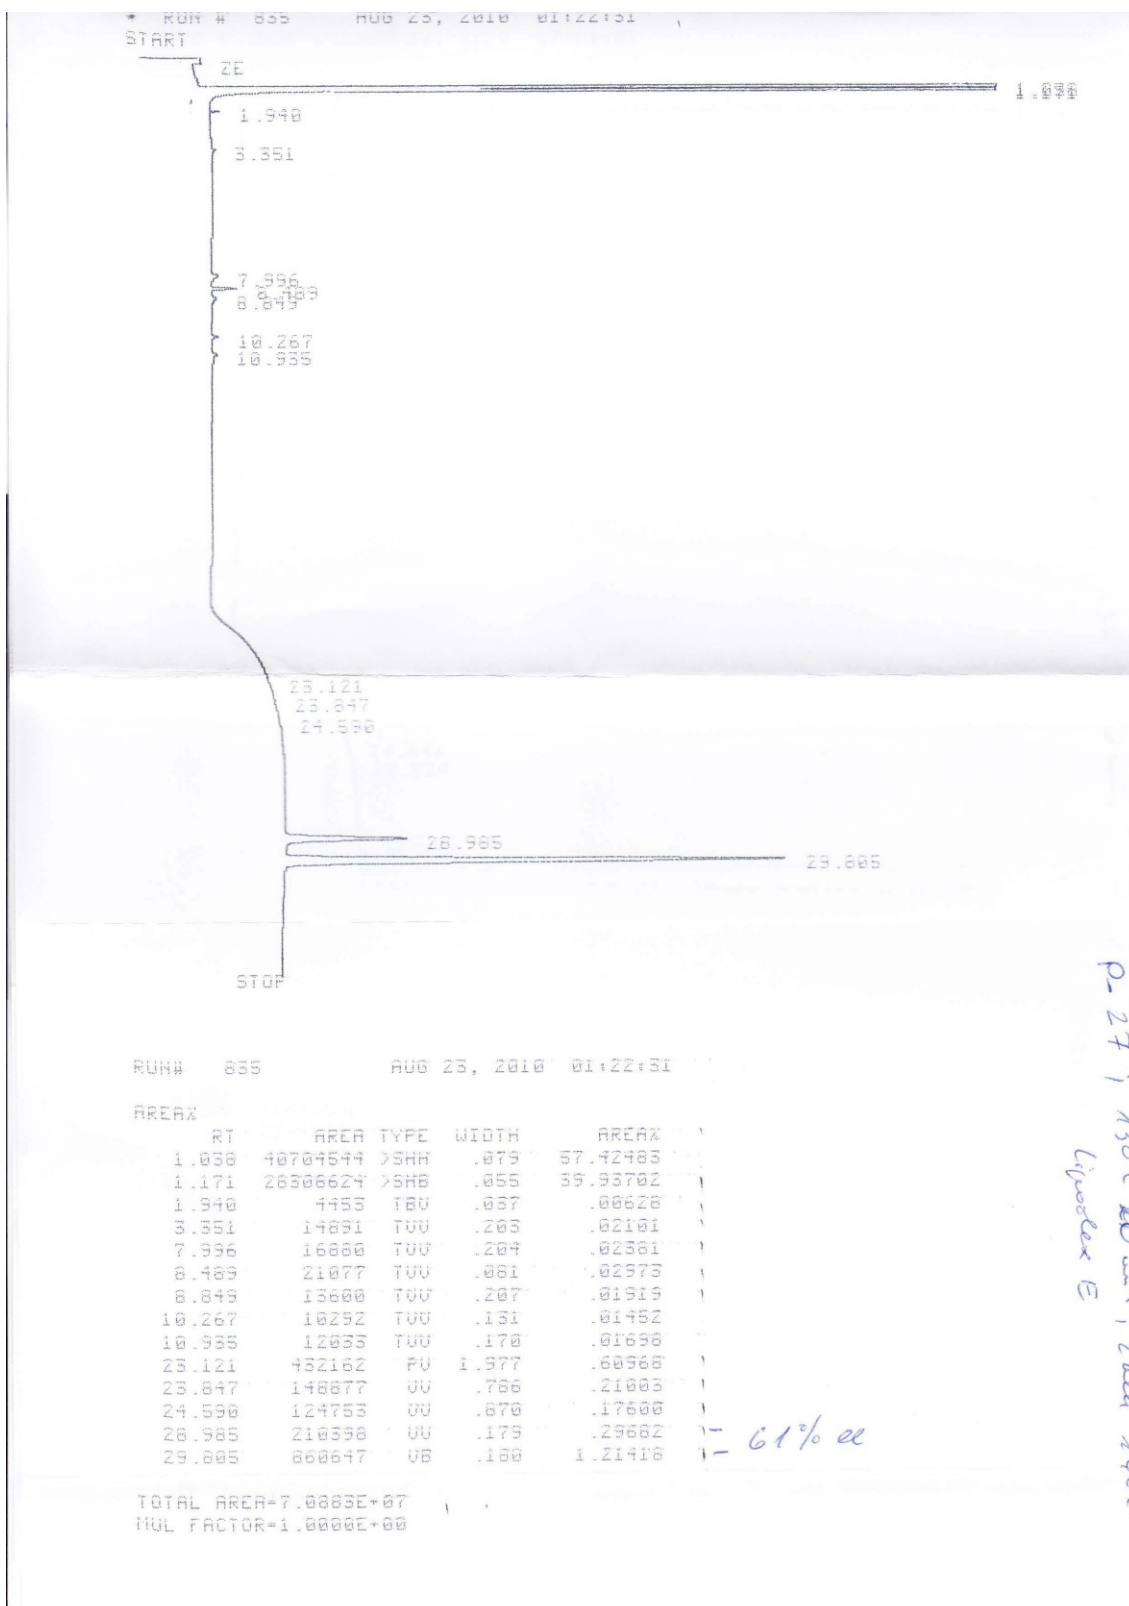

15a

UVA

Project Name: Miroslav  
Reported by User: System

*Breeze*

SAMPLE INFORMATION

|                   |                |                  |                  |
|-------------------|----------------|------------------|------------------|
| Sample Name:      | P-48_AD_column | Acquired By:     | System           |
| Sample Type:      | Unknown        | Date Acquired:   | 17/9/10 10.18.19 |
| Vial:             | 1              | Acq. Method:     | miro_95_5        |
| Injection #:      | 2              | Date Processed:  | 17/9/10 10.42.11 |
| Injection Volume: | 10.00 ul       | Channel Name:    | 2487Channel 1    |
| Run Time:         | 80.00 Minutes  | Sample Set Name: |                  |

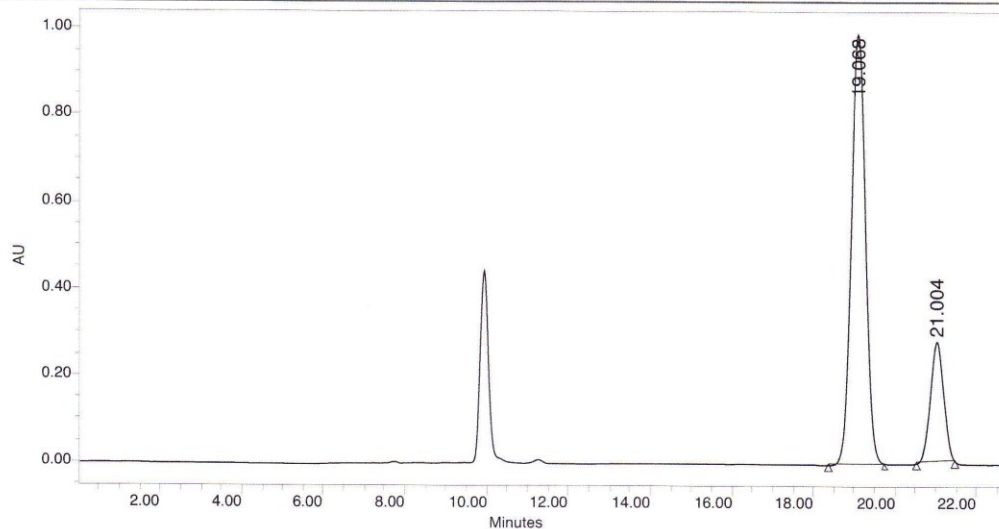

|   | RT (min) | Area (V*sec) | % Area | Height (V) | % Height |
|---|----------|--------------|--------|------------|----------|
| 1 | 19.068   | 24051596     | 79.19  | 992010     | 78.06    |
| 2 | 21.004   | 6320496      | 20.81  | 278804     | 21.94    |

16a

\* RUN # 864 SEP 2, 2010 07:38:27  
 START

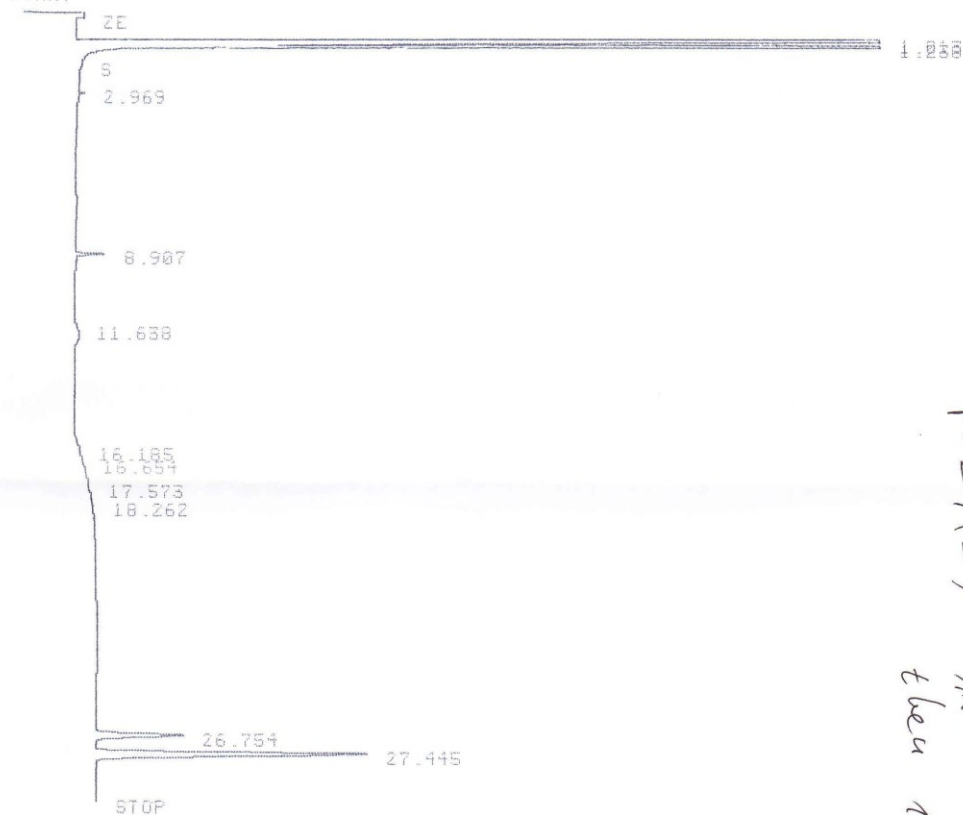

P-24(2)  
 then 110°C 15 min  
 then 120°C

RUN# 864 SEP 2, 2010 07:38:27

| RT     | AREA     | TYPE | WIDTH | AREA%           |
|--------|----------|------|-------|-----------------|
| 1.013  | 47429184 | >SHH | .092  | 69.30483        |
| 1.238  | 20278896 | >SHH | .039  | 29.63208        |
| 2.969  | 2962     | BP   | .044  | .00433          |
| 8.907  | 23837    | PU   | .084  | .03483          |
| 11.638 | 15016    | PU   | .346  | .02194          |
| 16.185 | 5579     | PU   | .274  | .00815          |
| 16.654 | 12164    | UU   | .354  | .01777          |
| 17.573 | 37594    | UU   | .812  | .05493          |
| 18.262 | 35361    | UU   | .615  | .05167          |
| 26.754 | 144424   | BU   | .169  | .21104 = 52% ee |
| 27.445 | 450644   | PU   | .173  | .65849 =        |

TOTAL AREA=6.8436E+07  
 MUL FACTOR=1.0000E+00

\*  
 \*

17a

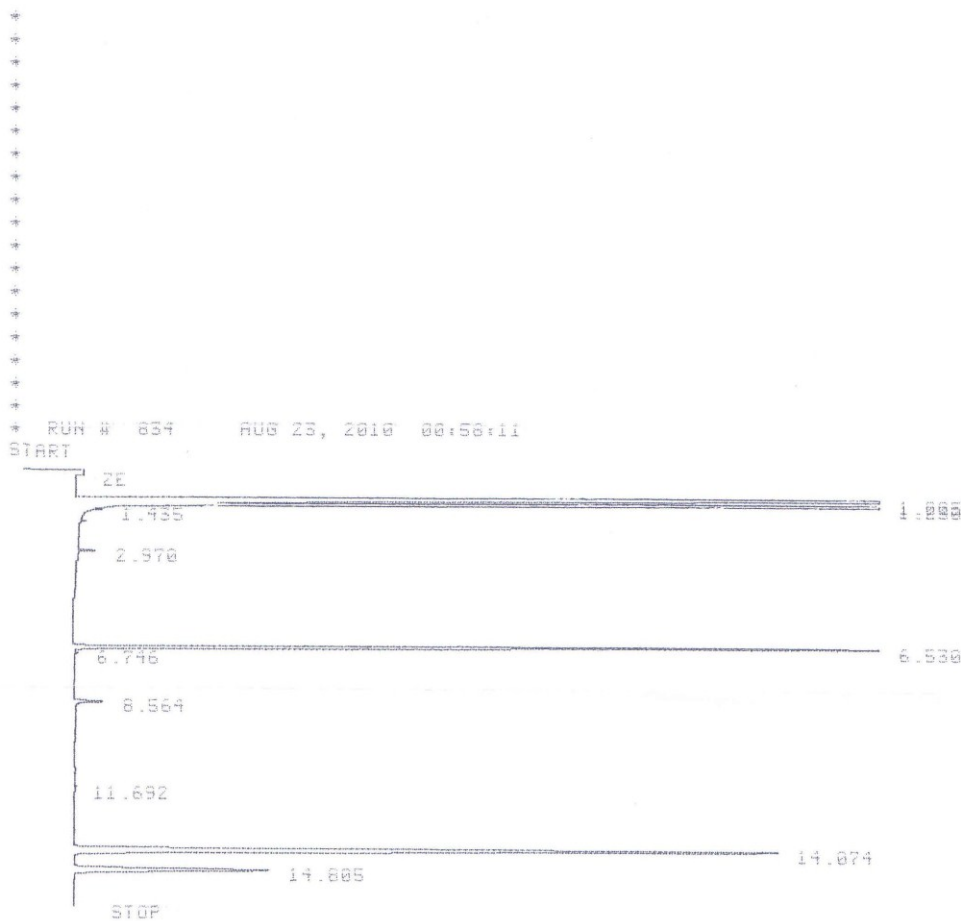

RUN# 834 AUG 23, 2010 00:58:11

| RT     | AREA     | TYPE | WIDTH | AREA%    |
|--------|----------|------|-------|----------|
| 1.005  | 50454912 | >SPH | .058  | 65.62677 |
| 1.230  | 27086496 | >SHB | .053  | 34.15776 |
| 1.435  | 3946     | TBB  | .036  | .00498   |
| 2.970  | 7745     | BP   | .041  | .00977   |
| 6.930  | 638123   | FB   | .062  | .00471   |
| 6.746  | 2454     | BP   | .059  | .00309   |
| 8.564  | 23684    | PV   | .065  | .02987   |
| 11.692 | 997      | UB   | .024  | .00126   |
| 14.074 | 834223   | PV   | .123  | 1.05201  |
| 14.805 | 245717   | PP   | .130  | .30966   |

TOTAL AREA=7.9298E+07  
MUL FACTOR=1.0000E+00

P-26  
110°C isothermic  
Lipodex E

= 55% ee



7b

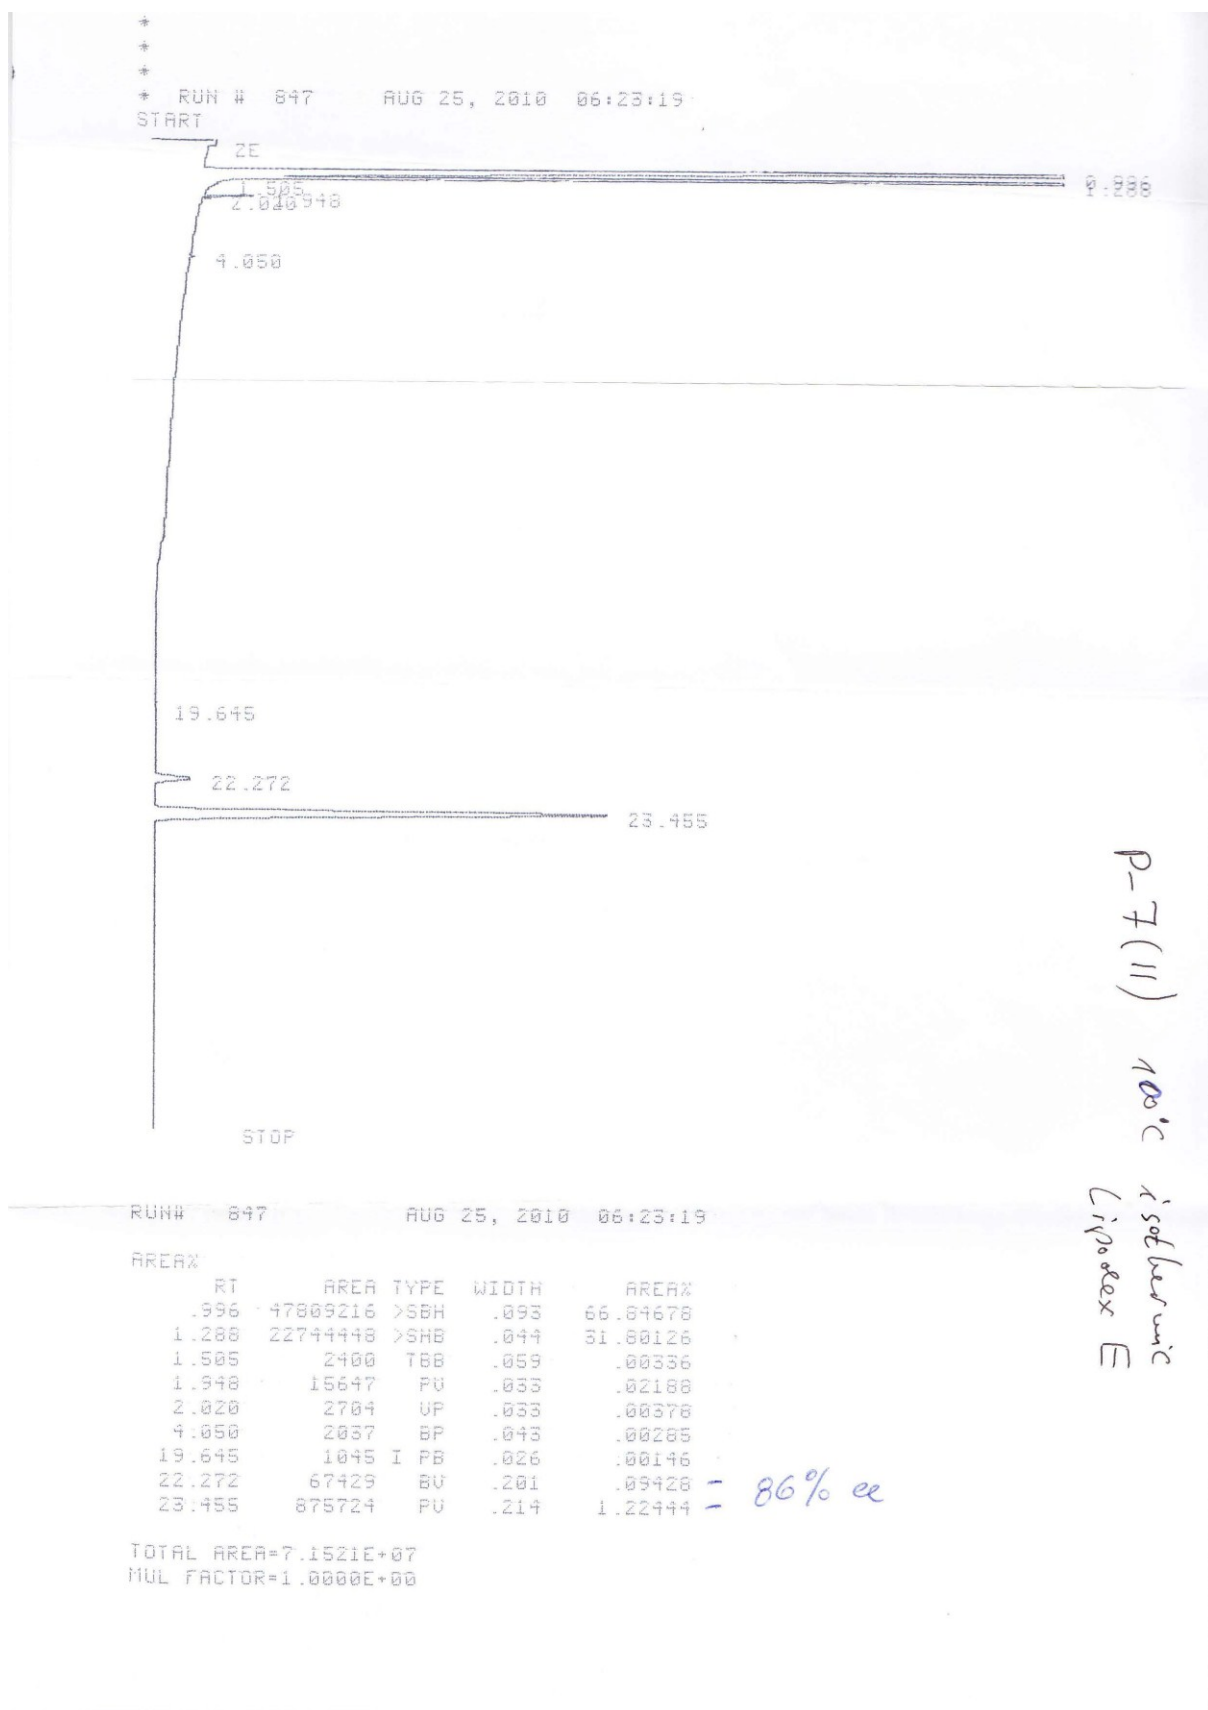

8b

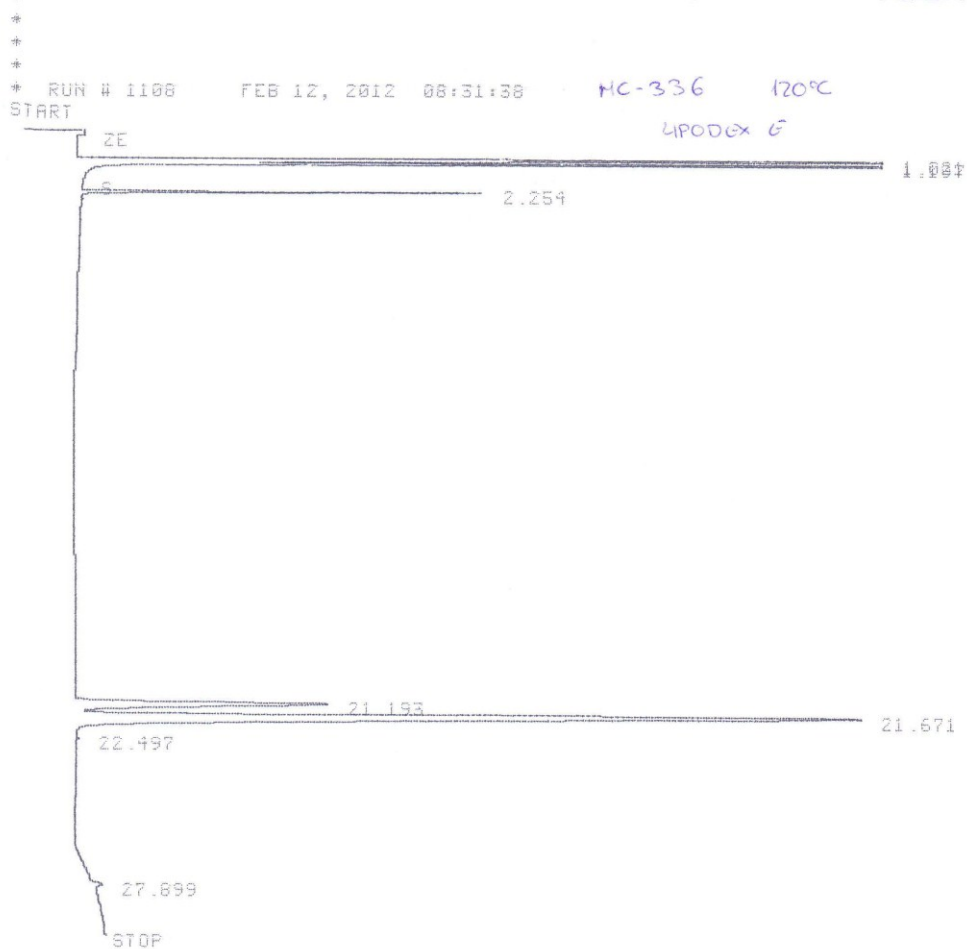

RUN# 1108 FEB 12, 2012 08:31:38

AREA%

| RT     | AREA     | TYPE | WIDTH | AREA%    |
|--------|----------|------|-------|----------|
| 1.021  | 36975040 | >SPH | .072  | 85.53539 |
| 1.197  | 4872234  | SHB  | .027  | 11.00753 |
| 2.254  | 132909   | PB   | .035  | .30027   |
| 21.193 | 470489   | BU   | .195  | 1.06295  |
| 21.671 | 1627566  | UV   | .217  | 3.67710  |
| 22.497 | 1753     | UB   | .034  | .00396   |
| 27.899 | 182734   | UV   | .668  | .41284   |

55% ee

TOTAL AREA=4.4263E+07  
MUL FACTOR=1.0000E+00

9b

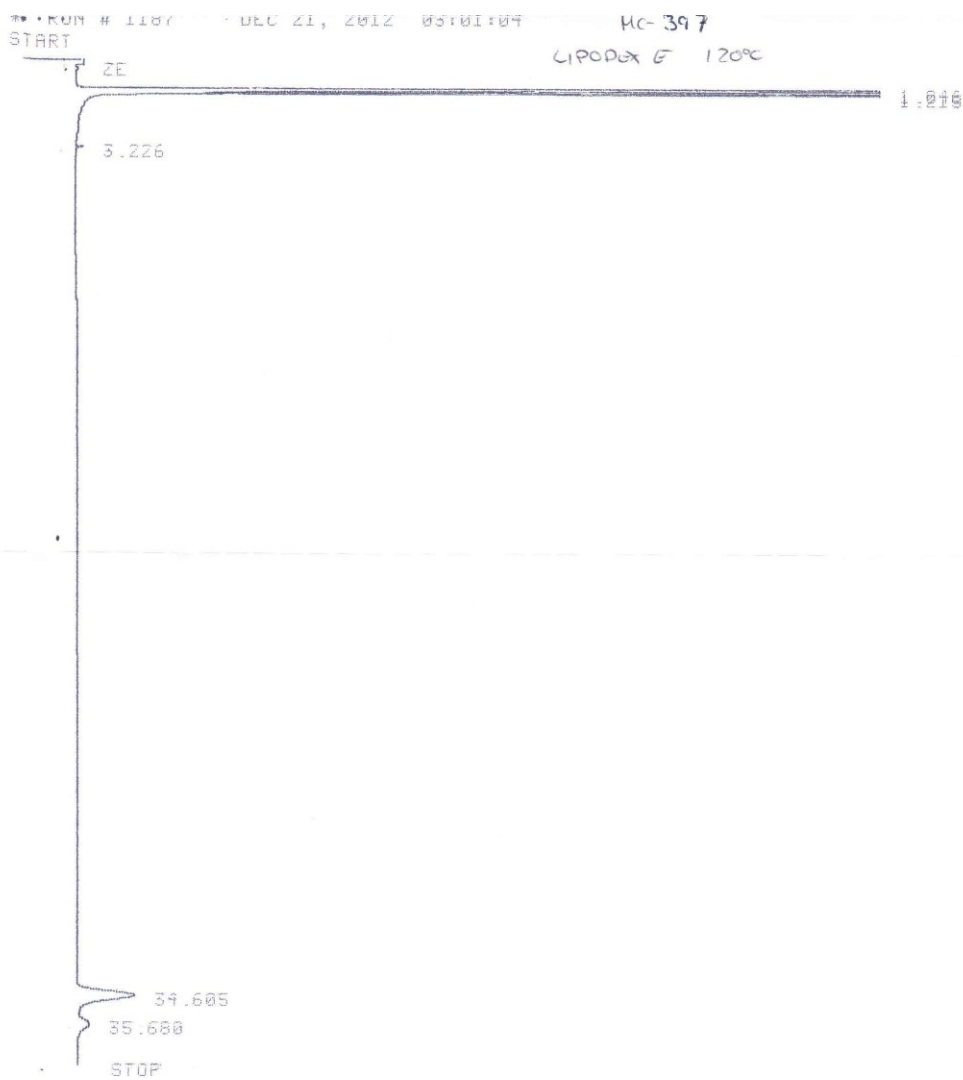

RUN# 1187 DEC 21, 2012 03:01:04

| RT     | AREA     | TYPE | WIDTH | AREA%    |
|--------|----------|------|-------|----------|
| 1.016  | 27946864 | SBB  | .054  | 85.26320 |
| 1.215  | 4557578  | TBB  | .017  | 13.90473 |
| 3.226  | 4270     | PB   | .053  | .01303   |
| 34.605 | 220417   | PV   | .399  | .67247   |
| 35.600 | 48036    | UP   | .398  | .14655   |

64%

TOTAL AREA=3.2777E+07  
MUL FACTOR=1.0000E+00

10b (T = -40 °C)

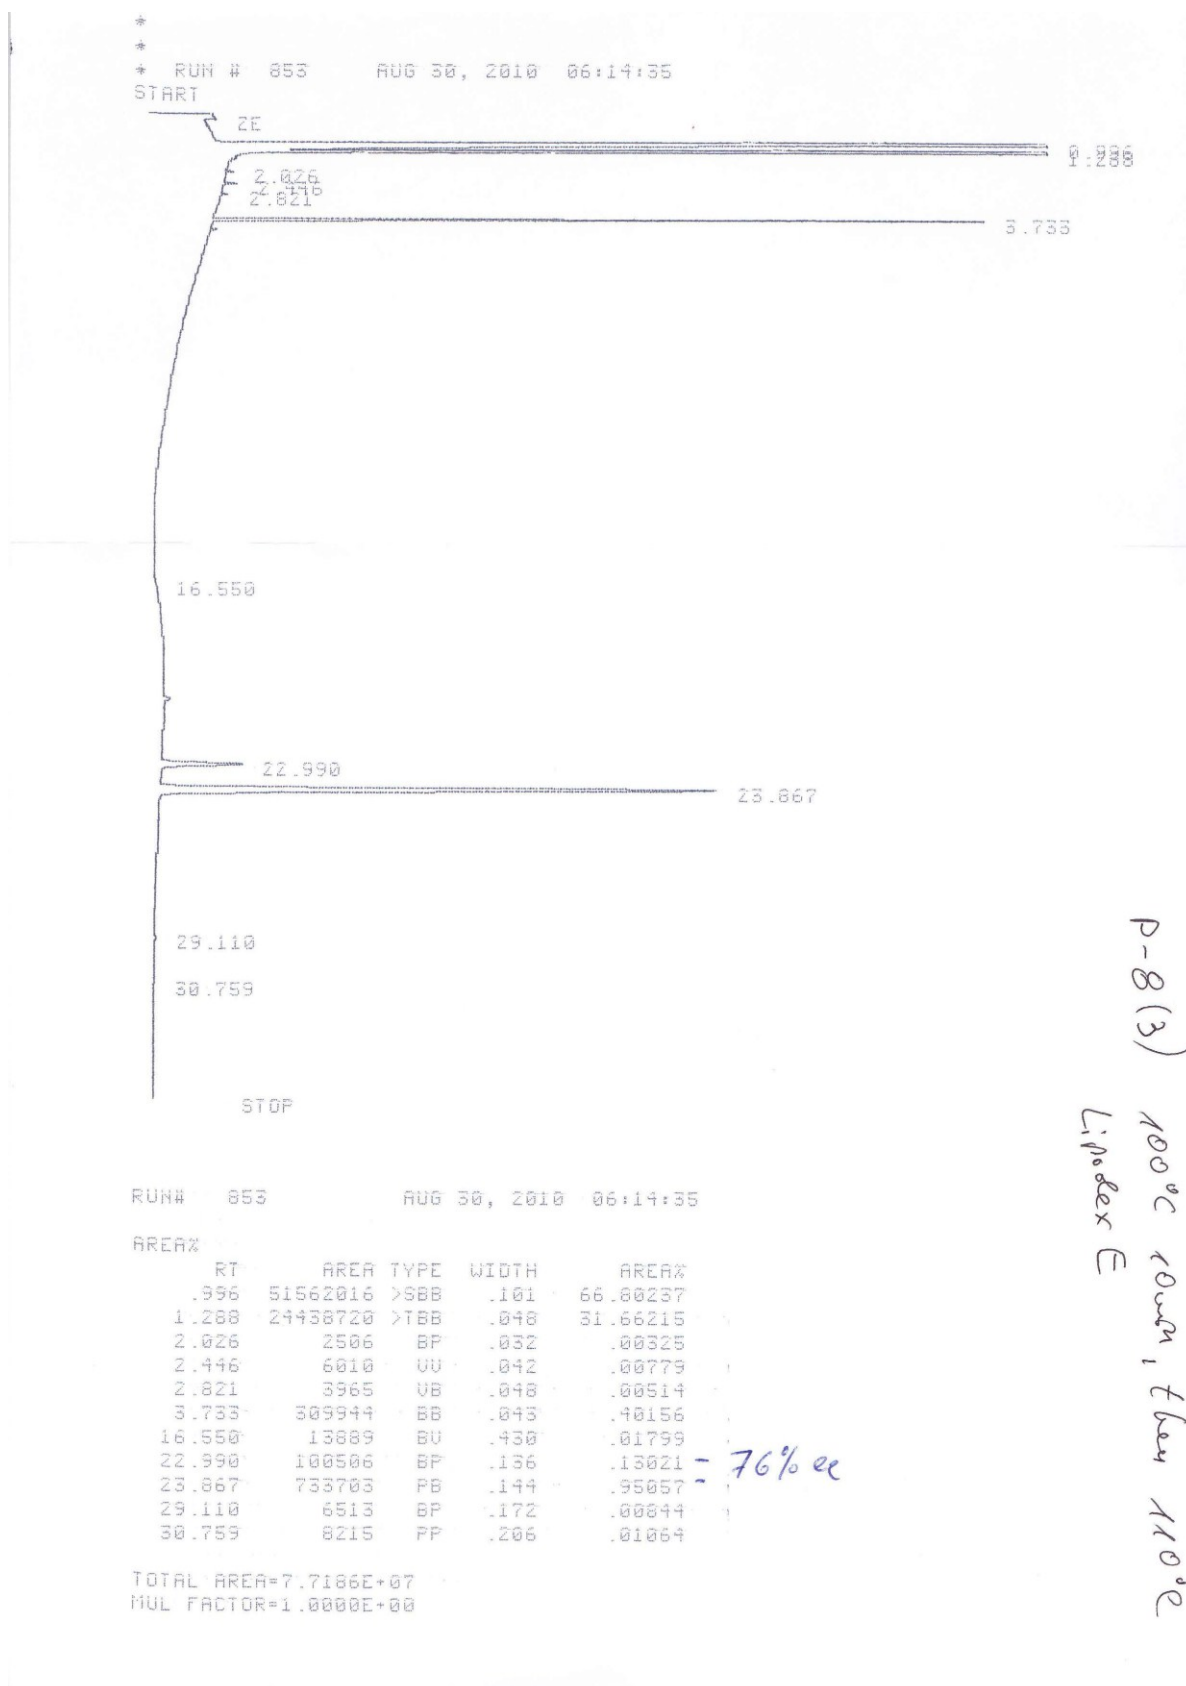

RUN# 853 AUG 30, 2010 06:14:35

| RT     | AREA     | TYPE | WIDTH | AREA%    |
|--------|----------|------|-------|----------|
| .996   | 51562016 | >SBB | .101  | 66.80237 |
| 1.288  | 24438720 | >TBB | .048  | 31.66215 |
| 2.026  | 2506     | BP   | .032  | .00325   |
| 2.446  | 6010     | UV   | .042  | .00779   |
| 2.821  | 3965     | VB   | .048  | .00514   |
| 3.733  | 309944   | BB   | .043  | .40156   |
| 16.550 | 13889    | BU   | .430  | .01799   |
| 22.990 | 100506   | BP   | .136  | .13021   |
| 23.867 | 733703   | PB   | .144  | .95057   |
| 29.110 | 6513     | BP   | .172  | .00844   |
| 30.759 | 8215     | PP   | .206  | .01064   |

TOTAL AREA=7.7186E+07  
 MUL FACTOR=1.0000E+00

P-8(3) 100°C room, then 110°C  
 Lipidex E

= 76% ee

11b

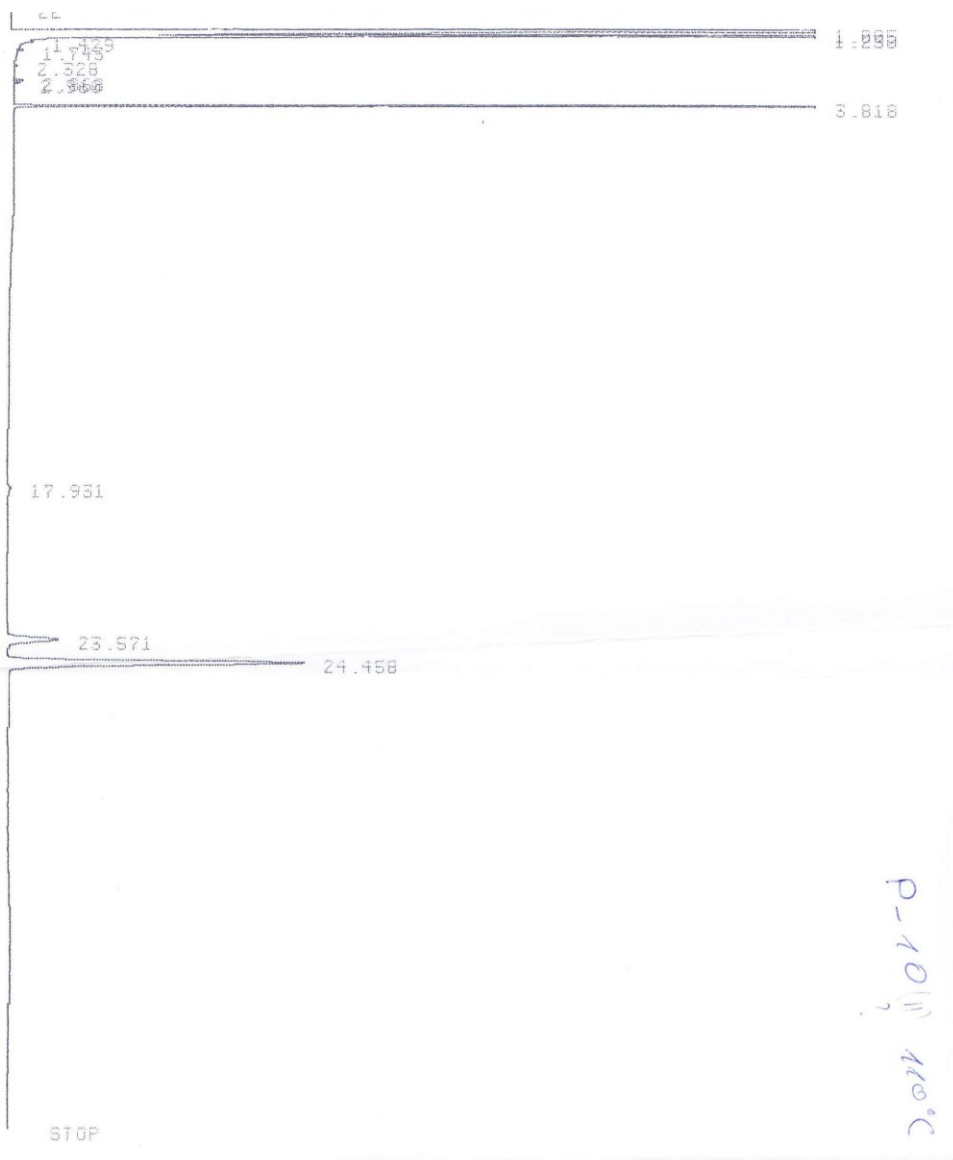

P-1011  
 110°C  
 isofluoroc

RUN# 848 AUG 25, 2010 07:00:52

| RT     | AREA     | TYPE | WIDTH | AREAX          |
|--------|----------|------|-------|----------------|
| 1.005  | 42649280 | >SPH | .083  | 65.41696       |
| 1.230  | 21402272 | >SHB | .042  | 32.82757       |
| 1.429  | 1987     | TBB  | .031  | .00305         |
| 1.743  | 1924     | TBB  | .031  | .00295         |
| 2.328  | 2276     | BP   | .050  | .00349         |
| 2.868  | 3812     | BP   | .034  | .00565         |
| 2.960  | 3374     | FU   | .043  | .00518         |
| 3.818  | 408935   | BB   | .040  | .62724         |
| 17.931 | 7622     | UU   | .174  | .01169         |
| 23.571 | 100940   | FP   | .205  | .15483 - 72% α |
| 24.458 | 613668   | FU   | .217  | .94127         |

TOTAL AREA=6.5196E+07  
 MUL FACTOR=1.0000E+00

12b

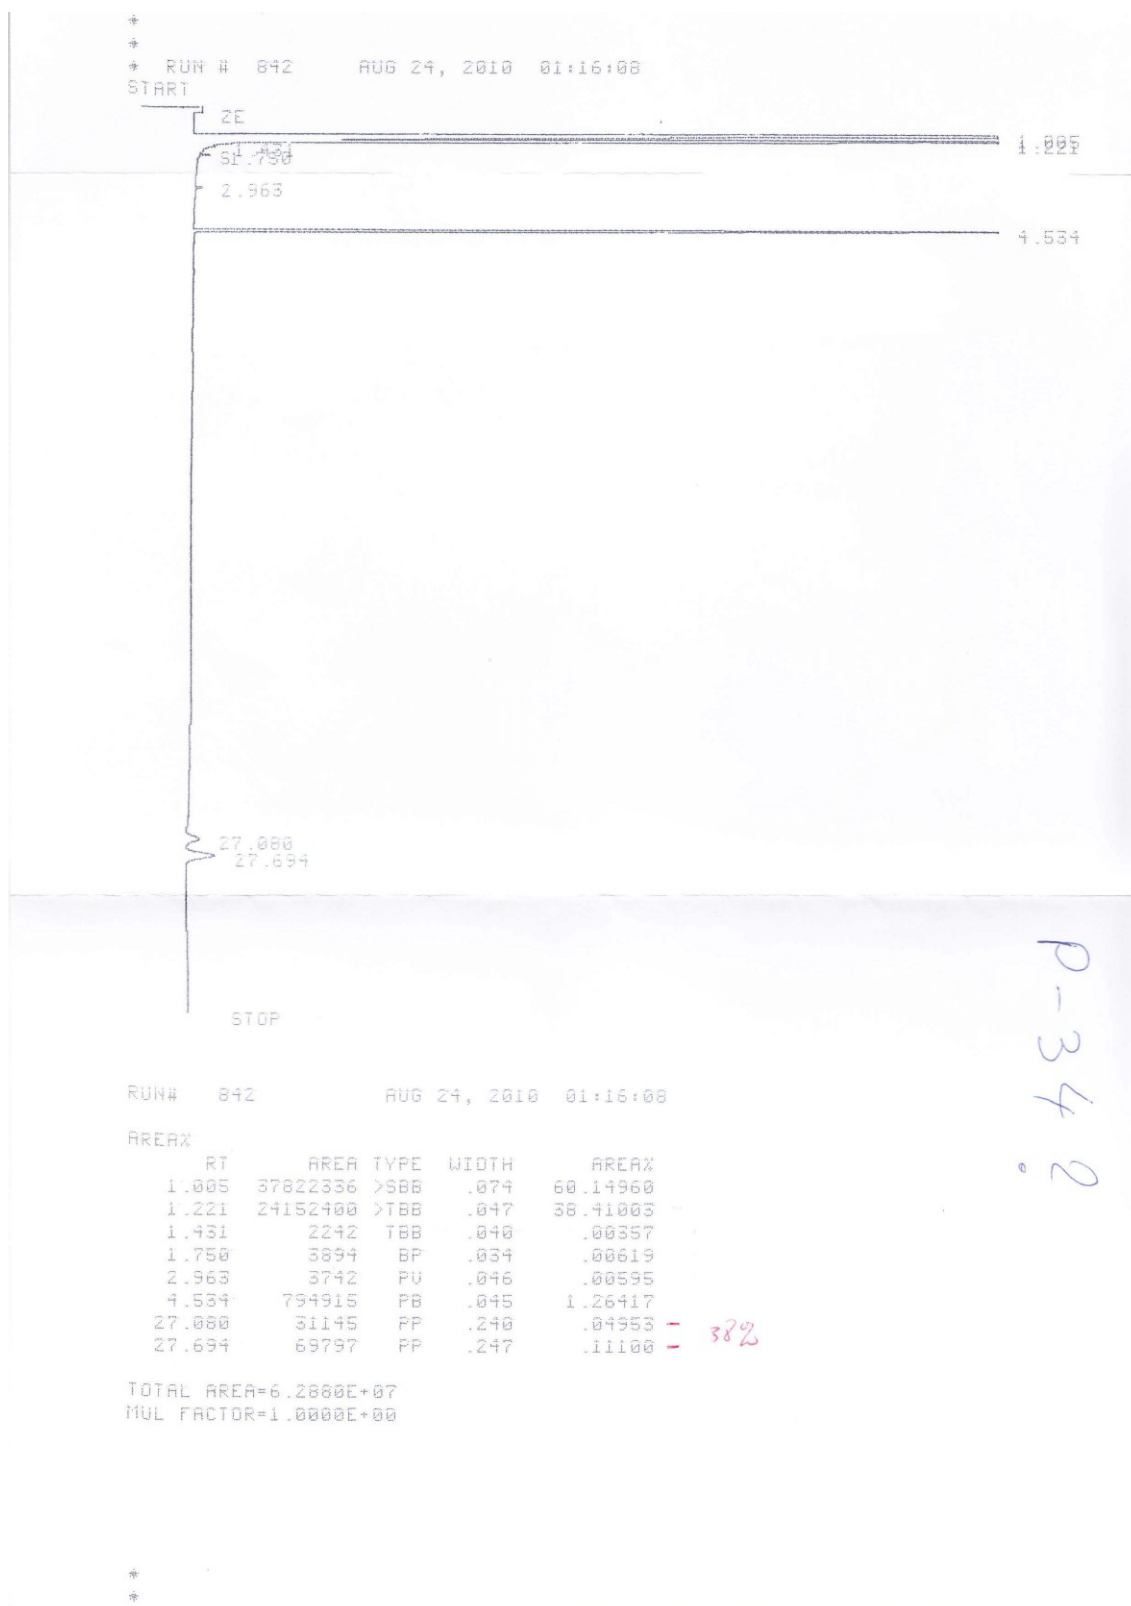

13b

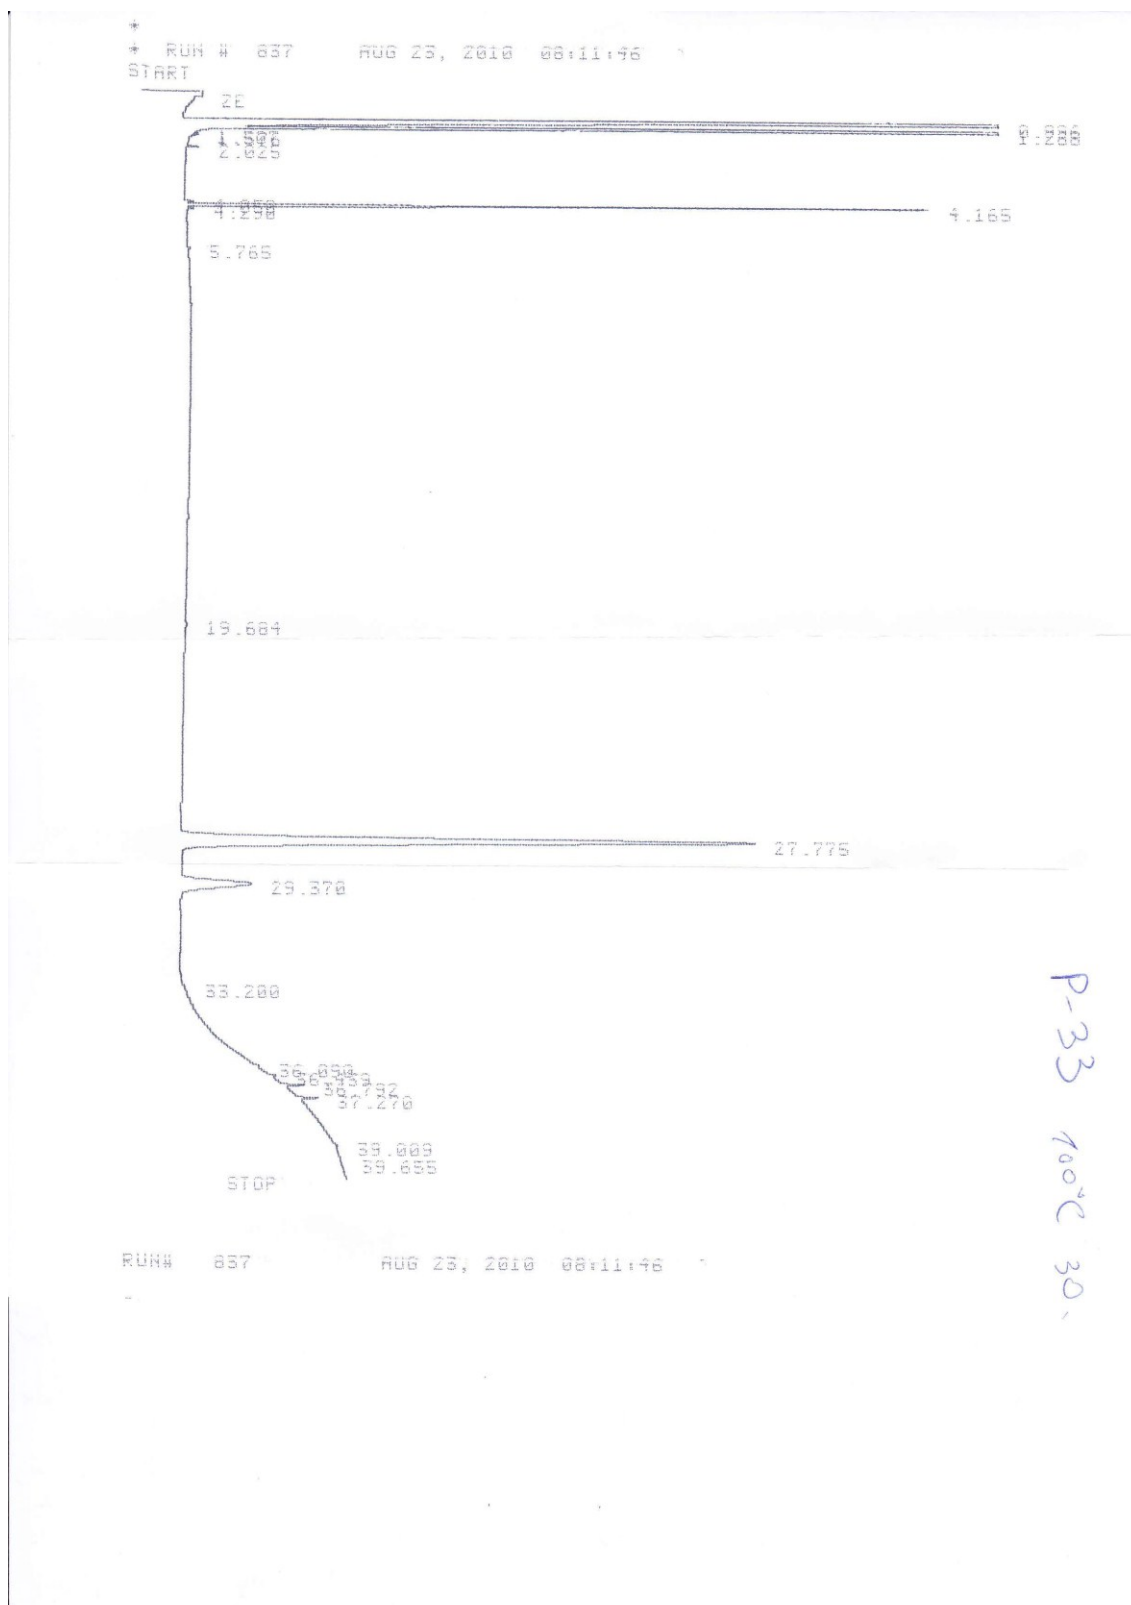





14b

UVA

Project Name: Miroslav  
Reported by User: System

*Breeze*

### SAMPLE INFORMATION

|                   |               |                  |                 |
|-------------------|---------------|------------------|-----------------|
| Sample Name:      | P-12          | Acquired By:     | System          |
| Sample Type:      | Unknown       | Date Acquired:   | 1/9/10 16.58.58 |
| Vial:             | 1             | Acq. Method:     | miro_95_5       |
| Injection #:      | 1             | Date Processed:  | 1/9/10 17.36.53 |
| Injection Volume: | 10.00 ul      | Channel Name:    | 2487Channel 1   |
| Run Time:         | 80.00 Minutes | Sample Set Name: |                 |

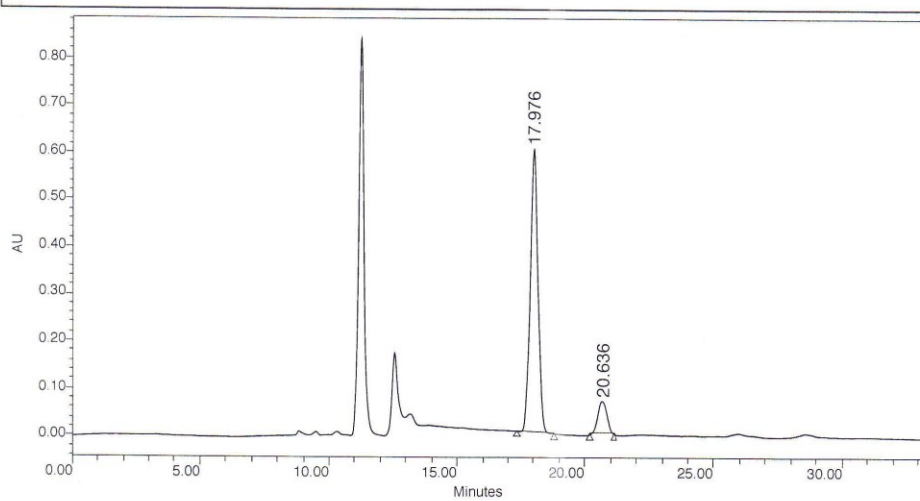

|   | RT (min) | Area (V*sec) | % Area | Height (V) | % Height |
|---|----------|--------------|--------|------------|----------|
| 1 | 17.976   | 12572860     | 87.79  | 600793     | 89.56    |
| 2 | 20.636   | 1747991      | 12.21  | 70028      | 10.44    |

15b

UVA

Project Name: Miroslav

Reported by User: System

*Breeze*

### SAMPLE INFORMATION

|                   |                |                  |                  |
|-------------------|----------------|------------------|------------------|
| Sample Name:      | P-46_AD_column | Acquired By:     | System           |
| Sample Type:      | Unknown        | Date Acquired:   | 17/9/10 18.01.05 |
| Vial:             | 1              | Acq. Method:     | miro_95_5        |
| Injection #:      | 3              | Date Processed:  | 17/9/10 18.34.17 |
| Injection Volume: | 10.00 ul       | Channel Name:    | 2487Channel 1    |
| Run Time:         | 80.00 Minutes  | Sample Set Name: |                  |

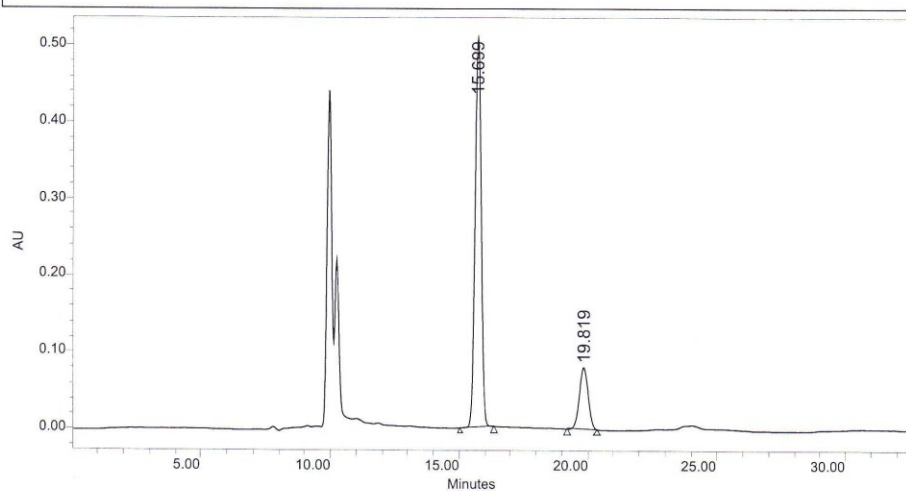

|   | RT (min) | Area (V*sec) | % Area | Height (V) | % Height |
|---|----------|--------------|--------|------------|----------|
| 1 | 15.699   | 8557827      | 81.79  | 506294     | 86.29    |
| 2 | 19.819   | 1904858      | 18.21  | 80435      | 13.71    |

16b

UVA

Project Name: Miroslav  
Reported by User: System

*Breeze*

### SAMPLE INFORMATION

|                   |                  |                  |                 |
|-------------------|------------------|------------------|-----------------|
| Sample Name:      | P-9(2)_AD_column | Acquired By:     | System          |
| Sample Type:      | Unknown          | Date Acquired:   | 16/9/10 9.40.56 |
| Vial:             | 1                | Acq. Method:     | miro_95_5       |
| Injection #:      | 1                | Date Processed:  | 16/9/10 9.58.16 |
| Injection Volume: | 10.00 ul         | Channel Name:    | 2487Channel 2   |
| Run Time:         | 80.00 Minutes    | Sample Set Name: |                 |

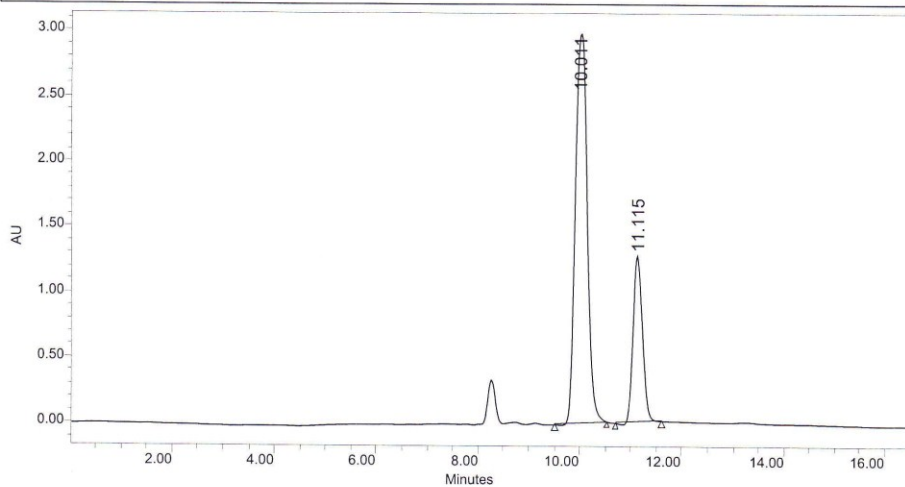

|   | RT (min) | Area (V*sec) | % Area | Height (V) | % Height |
|---|----------|--------------|--------|------------|----------|
| 1 | 10.011   | 48245071     | 74.66  | 2982946    | 70.14    |
| 2 | 11.115   | 16372052     | 25.34  | 1269840    | 29.86    |

17b

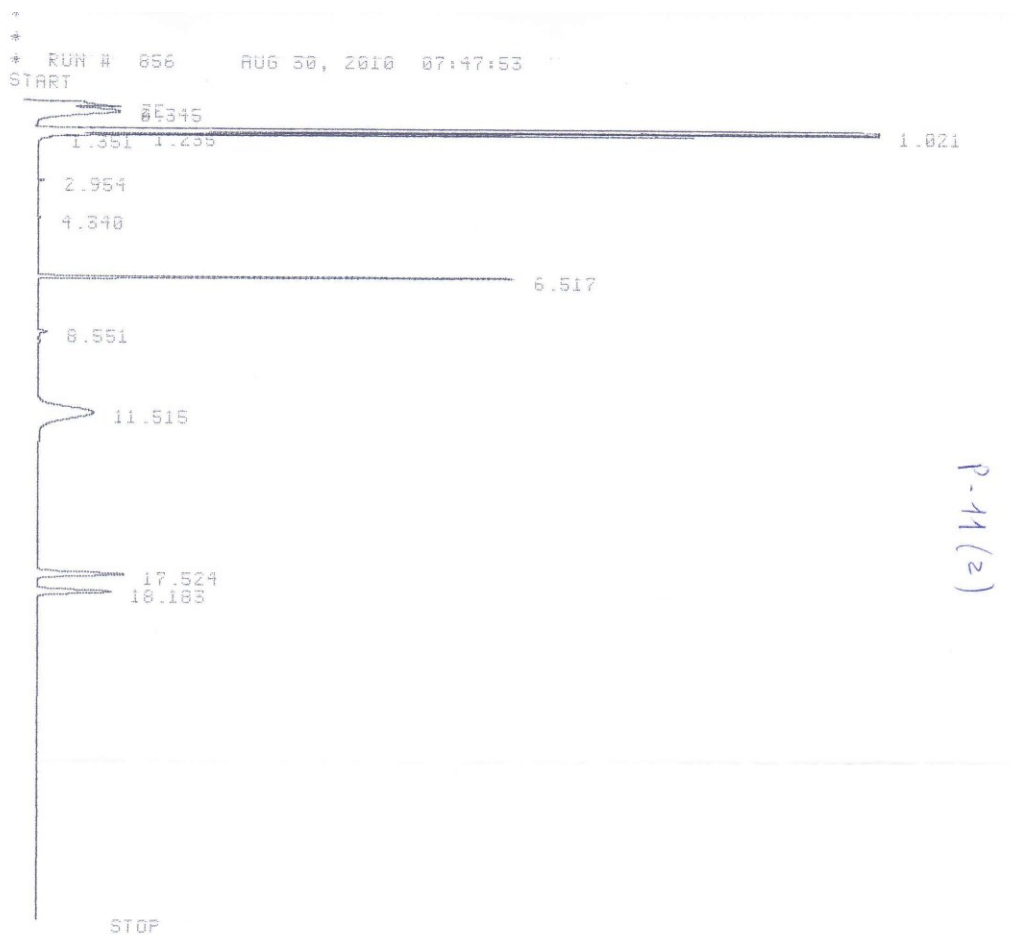

P-44(2)

RUN# 856 AUG 30, 2010 07:47:53

| RT     | AREA     | TYPE | WIDTH | AREA%    |
|--------|----------|------|-------|----------|
| 0.345  | 251483   | BP   | .315  | .62293   |
| 1.021  | 39206912 | >SPB | .076  | 97.11712 |
| 1.235  | 110905   | TBB  | .019  | .27472   |
| 2.954  | 2500     | FB   | .032  | .00619   |
| 4.340  | 1300     | BU   | .037  | .00322   |
| 6.517  | 273017   | FB   | .059  | .67627   |
| 8.551  | 8299     | PF   | .087  | .02056   |
| 11.515 | 271934   | BP   | .509  | .67359   |
| 17.524 | 129809   | PF   | .154  | .32154   |
| 18.183 | 114617   | PF   | .160  | .28391   |

TOTAL AREA=4.0371E+07  
MUL FACTOR=1.0000E+00

RUN# 856 AUG 30, 2010 08:02:01

18b

Data File C:\CHEM32\1\DATA\JM\C1217PURIFICAD7.D  
Sample Name: C1217purificado

HC-363 después de columna

=====  
Acq. Operator : Marta  
Acq. Instrument : HPLC 1200 Analitico Location : Vial 1  
Injection Date : 6/5/2012 11:48:30 AM Inj Volume : 5 µl  
Acq. Method : C:\CHEM32\1\METHODS\MIROSLAV.M  
Last changed : 6/5/2012 11:47:35 AM by Marta  
(modified after loading)  
Analysis Method : C:\CHEM32\1\METHODS\MIROSLAV.M  
Last changed : 6/5/2012 12:43:10 PM by Marta  
(modified after loading)  
Sample Info : muestra pasada por columna para purificarla disuelto e  
n nhexano:IPA(95:5) 5microlitros de inyección 0,5ml/min  
=====

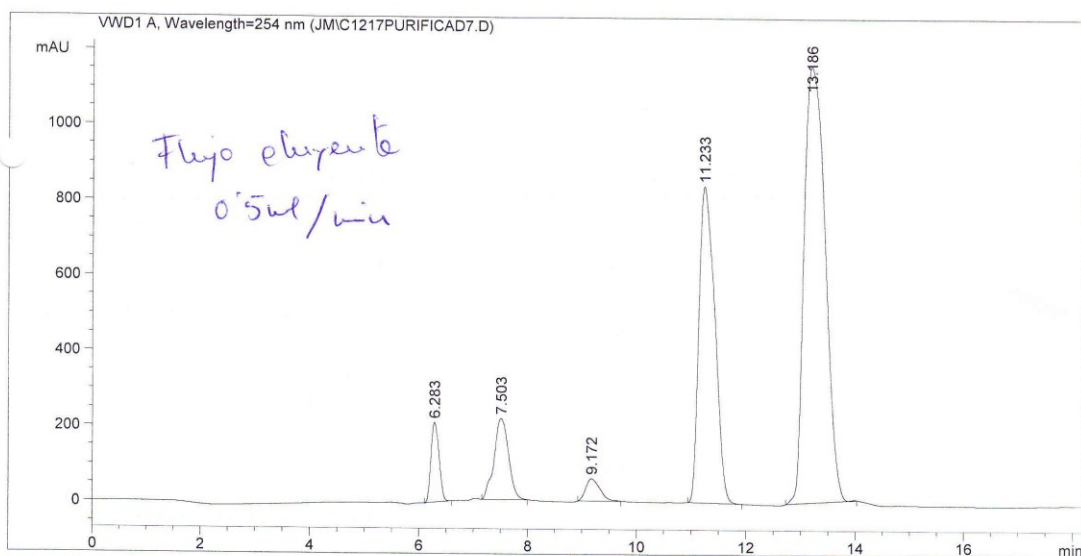

=====  
Area Percent Report  
=====

Sorted By : Signal  
Multiplier: 1.0000  
Dilution: 1.0000  
Do not use Multiplier & Dilution Factor with ISTDs

Signal 1: VWD1 A, Wavelength=254 nm

| Peak # | RetTime [min] | Type | Width [min] | Area mAU   | Height [mAU] | Area %  |
|--------|---------------|------|-------------|------------|--------------|---------|
| 1      | 6.283         | BB   | 0.1672      | 2161.36841 | 211.55856    | 3.9194  |
| 2      | 7.503         | BB   | 0.2876      | 3980.05493 | 214.72899    | 7.2173  |
| 3      | 9.172         | BB   | 0.2918      | 1063.90503 | 59.04171     | 1.9293  |
| 4      | 11.233        | BB   | 0.3377      | 1.68525e4  | 839.04865    | 30.5598 |
| 5      | 13.186        | BB   | 0.4403      | 3.10882e4  | 1156.62903   | 56.3743 |

HPLC 1200 Analitico 6/5/2012 12:45:23 PM Marta

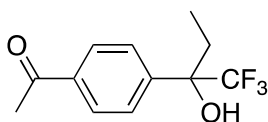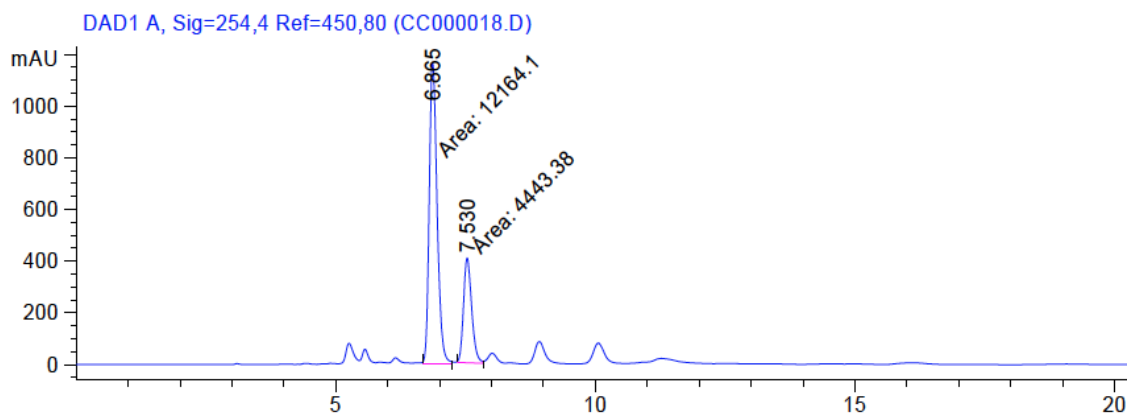

=====  
Area Percent Report  
=====

Sorted By : Signal  
Multiplier : 1.0000  
Dilution : 1.0000  
Use Multiplier & Dilution Factor with ISTDs

Signal 1: DAD1 A, Sig=254,4 Ref=450,80

| Peak # | RetTime [min] | Type | Width [min] | Area [mAU*s] | Height [mAU] | Area %  |
|--------|---------------|------|-------------|--------------|--------------|---------|
| 1      | 6.865         | MM   | 0.1736      | 1.21641e4    | 1167.76672   | 73.2447 |
| 2      | 7.530         | MM   | 0.1825      | 4443.38037   | 405.85910    | 26.7553 |

Totals : 1.66075e4 1573.62582

Signal 2: DAD1 B, Sig=220,4 Ref=450,80

Signal 3: DAD1 C, Sig=254,4 Ref=off

=====  
\*\*\* End of Report \*\*\*  
=====
